# Supplementary material for: Identification of two novel lipid metabolism-related long non-coding RNAs (SNHG17 and LINC00837) as potential signatures for osteosarcoma prognosis and precise treatment
Source: BMC Med Genomics. 2023 May 25;16:115. doi: 10.1186/s12920-023-01553-4 (PMC10210430; doi:10.1186/s12920-023-01553-4)
Supplement: Supplementary file 5 — Supplementary Material 5 [file 12920_2023_1553_MOESM5_ESM.xlsx]

## Sheet: metabolism_diff
	logFC	AveExpr	t	P.Value	adj.P.Val	B
PLPP3	-2.67375	10.122	-15.8541	8.79198e-11	5.25517e-08	15.0767
UGDH	-3.60792	8.80945	-12.5085	2.43118e-09	6.74223e-07	11.8582
AKR1C1	-2.45402	6.31412	-11.6331	6.56264e-09	1.38672e-06	10.8753
CHPT1	-1.65147	8.04764	-10.4046	2.94322e-08	3.88135e-06	9.3766
NCEH1	-3.05322	7.4785	-9.61141	8.35729e-08	8.33872e-06	8.32659
GPAT2	-1.41149	6.94461	-9.53184	9.3124e-08	8.85591e-06	8.21741
HSD3B7	-1.46944	7.15403	-9.38375	1.14106e-07	1.00685e-05	8.01225
CAV1	-4.77403	7.36133	-9.25838	1.3577e-07	1.13794e-05	7.83659
ABHD5	-1.85328	7.40942	-9.24426	1.38471e-07	1.15034e-05	7.81668
FIG4	-2.01171	6.88274	-9.17315	1.52953e-07	1.23937e-05	7.7161
CSNK2A2	-1.17839	8.57442	-9.17079	1.53459e-07	1.23937e-05	7.71277
DGKA	-1.43213	8.24398	-9.11734	1.65436e-07	1.28111e-05	7.63675
GOT2	-1.58595	8.73336	-9.09225	1.71394e-07	1.30329e-05	7.60096
NDUFAB1	-1.33283	7.64032	-9.08219	1.73846e-07	1.30719e-05	7.58658
PLPP1	-2.21033	6.84282	-9.00028	1.95247e-07	1.38019e-05	7.46909
YWHAH	-1.58911	9.17896	-9.00019	1.95271e-07	1.38019e-05	7.46896
ESYT1	-2.07027	8.96443	-8.88324	2.3078e-07	1.5543e-05	7.29978
ANKRD1	-4.10717	6.04763	-8.87334	2.34082e-07	1.56536e-05	7.28539
GLIPR1	-3.84323	8.57796	-8.84629	2.43366e-07	1.59909e-05	7.24599
MGLL	-2.43825	7.24058	-8.81102	2.56056e-07	1.65033e-05	7.19449
CDIPT	-1.80468	9.04658	-8.75337	2.78326e-07	1.74956e-05	7.10997
SUCLG2	-1.73437	8.20364	-8.66049	3.18606e-07	1.92573e-05	6.97295
NTHL1	-1.08657	7.04934	-8.59898	3.48635e-07	2.03547e-05	6.8816
ILK	-2.15214	9.02706	-8.56959	3.64021e-07	2.08654e-05	6.83779
HSD17B12	-2.2154	8.30733	-8.44389	4.38378e-07	2.34191e-05	6.64918
RAP1GDS1	-1.46457	7.79953	-8.3602	4.9664e-07	2.56593e-05	6.5225
PLIN3	-3.15845	8.07205	-8.21681	6.16241e-07	3.05461e-05	6.30333
ELOVL1	-1.61979	9.15171	-8.13009	7.02984e-07	3.32384e-05	6.1695
LTA4H	-1.92996	8.35551	-8.10736	7.27786e-07	3.41105e-05	6.13426
DLST	-1.37644	8.64114	-8.05369	7.90084e-07	3.62069e-05	6.05077
UROD	-1.0742	8.52833	-7.915	9.78495e-07	4.19374e-05	5.83328
VDAC2	-2.09231	9.64634	-7.84168	1.09669e-06	4.54535e-05	5.71727
FITM2	-1.33657	7.01674	-7.81696	1.13984e-06	4.67202e-05	5.67801
ECI1	-1.25966	7.59069	-7.75718	1.25177e-06	5.01188e-05	5.58268
AQP7	1.27019	6.5042	7.68566	1.40104e-06	5.34834e-05	5.46803
METAP1	-1.60789	8.43475	-7.66392	1.45005e-06	5.45562e-05	5.43303
PTGS1	1.12009	6.5466	7.58705	1.63824e-06	6.01319e-05	5.3088
SPTLC3	-2.75451	6.04408	-7.54064	1.76416e-06	6.32586e-05	5.2334
SLC27A4	-1.22956	7.86122	-7.54054	1.76445e-06	6.32586e-05	5.23323
TSPO	-1.4187	7.55838	-7.48415	1.93128e-06	6.7636e-05	5.14122
CARM1	-1.72834	8.00167	-7.42295	2.13125e-06	7.24134e-05	5.04087
MMP1	-1.97982	5.47346	-7.31809	2.52602e-06	8.15679e-05	4.86775
COMT	-1.64798	8.63899	-7.3121	2.55076e-06	8.15753e-05	4.85782
PRKD3	1.78028	7.88622	7.22916	2.92094e-06	8.98583e-05	4.71974
GNAI2	-1.36344	10.3823	-7.20446	3.04176e-06	9.26681e-05	4.67844
PNPLA6	-1.68893	7.50921	-7.18697	3.13048e-06	9.46068e-05	4.64914
TRADD	-1.58622	7.76439	-7.03423	4.03097e-06	0.000113288	4.39146
MED31	-1.09379	7.28755	-7.01937	4.132e-06	0.000115439	4.36623
FAR2	-2.05394	5.97671	-6.87134	5.29662e-06	0.00013892	4.11309
GLTP	-1.28142	8.1	-6.79002	6.07833e-06	0.000154273	3.97274
NR1H2	-1.46756	7.74642	-6.76374	6.35613e-06	0.000158556	3.92717
MCAT	-1.17089	7.86906	-6.74417	6.57162e-06	0.000161619	3.89318
CRAT	-1.74614	7.7867	-6.54829	9.20082e-06	0.000204128	3.55003
SEC24D	-1.03525	9.42999	-6.50044	9.99721e-06	0.000216698	3.46539
RAN	-1.62011	10.3832	-6.48265	1.03112e-05	0.000222737	3.43385
SPTLC2	-1.49135	8.30703	-6.47049	1.0532e-05	0.000224707	3.41225
PCYT2	-1.19817	8.27913	-6.4678	1.05814e-05	0.000225474	3.40748
ARF1	-1.23435	10.4472	-6.44387	1.10324e-05	0.000229889	3.36492
PIK3CG	2.93474	6.81075	6.42996	1.13038e-05	0.000232969	3.34014
PAFAH1B1	-1.27142	9.24412	-6.42753	1.1352e-05	0.000233707	3.3358
HSD17B13	1.08255	4.66457	6.39196	1.20813e-05	0.000241624	3.27232
SOAT1	-1.77544	8.23241	-6.35885	1.28043e-05	0.000251001	3.21306
ALDH9A1	-1.19972	9.06922	-6.33168	1.34313e-05	0.000258854	3.16432
ETFDH	-1.57172	7.40389	-6.20696	1.67488e-05	0.000304286	2.93928
CPNE3	-1.49654	8.8354	-6.08688	2.0757e-05	0.000352962	2.72058
VDAC3	-1.37621	9.91599	-6.0351	2.27829e-05	0.000375888	2.62566
HCCS	-1.73887	8.28911	-5.96502	2.58587e-05	0.000410288	2.49662
SYNJ2	-2.01575	7.66639	-5.964	2.59066e-05	0.000410543	2.49474
LDHA	-2.21563	11.4221	-5.84858	3.19616e-05	0.000482571	2.28075
HSPH1	-1.09125	9.35864	-5.82863	3.31496e-05	0.000496139	2.24357
PTPN11	-1.02186	9.77702	-5.80595	3.45556e-05	0.00050905	2.20126
ACOX2	-1.94446	6.00535	-5.7854	3.5884e-05	0.000522549	2.16285
CDK8	-1.37024	7.5474	-5.67362	4.40972e-05	0.000604789	1.95298
HSDL2	-1.4145	7.62048	-5.62083	4.8634e-05	0.000650766	1.8533
ODC1	-1.71285	9.86069	-5.61838	4.88564e-05	0.000652966	1.84865
SMPD1	-2.05969	8.5581	-5.59809	5.07354e-05	0.000671248	1.81024
ACADVL	-1.01545	9.64162	-5.59602	5.09314e-05	0.000672594	1.80632
AKR1C2	-1.83244	5.61386	-5.55121	5.53699e-05	0.000712741	1.72129
FH	-1.20468	7.44534	-5.47291	6.41169e-05	0.000788211	1.57207
PLEKHA5	2.14311	9.11176	5.46311	6.53083e-05	0.000796627	1.55334
INSR	1.97786	8.77467	5.43666	6.86398e-05	0.000827099	1.50274
PTPMT1	-1.01769	7.77873	-5.40256	7.31981e-05	0.000867066	1.43736
PRKD1	-2.58678	6.79549	-5.39329	7.44905e-05	0.000878274	1.41956
GPX1	-1.68874	9.99121	-5.37074	7.77345e-05	0.000906005	1.37622
GLB1L	-1.35213	6.64765	-5.36972	7.78844e-05	0.000906822	1.37426
GRHPR	-1.35533	8.0578	-5.3542	8.0207e-05	0.00092567	1.34439
PPP1CA	-1.13563	9.63536	-5.25857	9.61874e-05	0.00106193	1.15974
LPL	3.5205	7.88293	5.23013	0.000101551	0.00110378	1.10462
CYP1B1	-3.84014	8.5967	-5.20146	0.000107272	0.00114033	1.04895
RUFY1	-1.07773	8.31086	-5.16286	0.000115506	0.00120011	0.973852
TXNRD1	-1.4258	9.27554	-5.08407	0.000134404	0.00134675	0.820039
NPC1	-1.15555	8.96323	-5.07805	0.000135974	0.00135815	0.808254
ACO2	-1.29822	8.65576	-5.07523	0.000136714	0.0013641	0.802744
ARF3	-1.02747	10.0654	-5.07184	0.000137611	0.00137213	0.796107
ADCY7	-1.51385	7.63095	-5.02693	0.000150088	0.0014546	0.708055
PLA2G15	-1.60459	7.70739	-5.02435	0.000150839	0.00145798	0.702994
MIF	-1.29299	9.34817	-4.98511	0.000162754	0.00153614	0.625888
PPM1L	1.85284	7.02262	4.97323	0.000166551	0.0015626	0.602504
ACAT2	-1.36768	7.22045	-4.89064	0.0001956	0.00176236	0.439553
INPP5D	2.44664	7.68799	4.84977	0.000211856	0.00186169	0.358675
PLA2G7	2.97944	6.60755	4.8474	0.000212842	0.00186688	0.353971
LGALS1	-2.23798	11.0486	-4.8103	0.000228881	0.00196461	0.280403
PLA2G5	-1.03323	5.8317	-4.74703	0.00025917	0.00213486	0.154611
STS	-1.69017	6.92753	-4.74624	0.000259574	0.00213648	0.153035
GPX8	-1.58448	8.97397	-4.73921	0.000263189	0.00215886	0.139038
ECHS1	-1.04757	9.59084	-4.71882	0.000273975	0.00222603	0.098406
PIK3C2B	1.34082	6.72538	4.71674	0.000275101	0.00223037	0.0942597
DGKD	1.18917	7.98367	4.69994	0.000284364	0.00227999	0.0607614
G6PC3	-1.37335	8.16647	-4.68512	0.000292807	0.00232789	0.0311731
ALOX5AP	1.75565	6.46858	4.67087	0.000301166	0.00237831	0.00271179
IDI1	-1.18928	7.59092	-4.66485	0.000304769	0.00240374	-0.00931141
ARSB	-1.37341	8.60501	-4.62366	0.00033065	0.00255444	-0.0916925
GBA	-1.71216	8.49311	-4.59979	0.000346676	0.0026372	-0.139516
ABCC1	-1.14941	8.86618	-4.59883	0.000347333	0.00264113	-0.141428
ALAS1	-1.03422	8.81903	-4.57522	0.000364	0.00274134	-0.188772
APEX1	-1.30755	9.9146	-4.54457	0.000386863	0.00288586	-0.250284
ACAT1	-1.71639	7.85743	-4.49371	0.000428108	0.00309439	-0.352529
PDHB	-1.44177	7.81898	-4.48334	0.000437057	0.00313862	-0.3734
ELOVL6	-3.08886	5.8766	-4.47597	0.000443526	0.0031754	-0.388222
PON3	1.25674	5.48406	4.47122	0.000447753	0.00319475	-0.39779
PTGR1	-2.03211	8.72604	-4.46016	0.000457752	0.00324766	-0.420066
APOC1	2.37619	6.79146	4.45907	0.000458749	0.00325229	-0.422261
SLC44A3	1.26378	6.6914	4.45149	0.000465751	0.0032908	-0.437537
GPX4	-1.35495	10.685	-4.43067	0.000485553	0.00337382	-0.479519
AKR1C3	-2.97845	6.32217	-4.4112	0.000504843	0.00346068	-0.518789
CYP51A1	-1.58285	8.67202	-4.40102	0.000515243	0.00351409	-0.53934
DEGS1	-1.34912	8.60817	-4.38987	0.000526887	0.00356898	-0.561859
SLC25A1	-1.24512	8.14702	-4.38686	0.000530075	0.00358413	-0.567936
PI4K2A	-1.06671	8.36977	-4.38436	0.000532733	0.00359534	-0.572977
LPCAT4	-1.00977	7.49423	-4.34573	0.000575661	0.00381575	-0.651036
AKR1B1	-1.50272	8.99295	-4.33279	0.000590821	0.00389162	-0.677209
NCOA1	1.01908	8.62812	4.31944	0.000606891	0.00396247	-0.704225
PNPLA3	-1.51423	6.35617	-4.30212	0.000628409	0.00405423	-0.739291
OSBPL3	-1.1061	8.22241	-4.29533	0.000637056	0.00409847	-0.753045
DLD	-1.09241	9.35255	-4.2952	0.000637221	0.00409847	-0.753304
SORBS1	1.6377	5.82868	4.27058	0.000669608	0.00424167	-0.80318
S100A10	-1.44152	12.1299	-4.2115	0.000754357	0.00461508	-0.922997
RAB14	-1.61327	9.18485	-4.2114	0.000754496	0.00461508	-0.923182
HSD17B3	1.19663	5.28476	4.19767	0.000775719	0.00471114	-0.951056
GPD2	-1.1614	8.20224	-4.17134	0.000818129	0.00489631	-1.00452
SERINC1	-1.03687	9.68891	-4.16913	0.000821795	0.00491018	-1.00901
SUCLA2	-1.35835	8.80656	-4.14401	0.000864645	0.00508276	-1.06005
PTGES3	-1.45712	9.55754	-4.12411	0.000900207	0.00525516	-1.1005
PON2	-1.04906	9.46906	-4.10509	0.000935596	0.00539886	-1.13919
TBXAS1	1.45696	6.8973	4.08495	0.000974604	0.00556942	-1.18016
ACLY	-1.6828	9.80605	-4.0761	0.00099226	0.00562937	-1.19816
UGCG	-1.823	8.44509	-4.06985	0.00100493	0.00568756	-1.21088
SDHA	-1.10554	9.87494	-4.05866	0.00102804	0.0057793	-1.23367
MED27	-1.10876	6.14922	-4.03218	0.00108484	0.0060312	-1.28756
CD36	5.14451	8.01853	3.99237	0.00117634	0.00641262	-1.36866
CTSA	-2.03651	10.1692	-3.98655	0.00119035	0.00648014	-1.38051
NFKBIA	1.00589	9.56257	3.98601	0.00119166	0.00648363	-1.38161
PIP4K2B	-1.06975	8.39201	-3.98402	0.0011965	0.00650622	-1.38566
ORMDL2	-1.24082	7.61626	-3.98037	0.00120541	0.00654337	-1.39309
PTGIS	-2.11087	8.53868	-3.97521	0.00121814	0.00659507	-1.4036
PPP1CC	-1.19879	10.555	-3.94503	0.00129537	0.00692997	-1.46511
ALDH7A1	-1.53009	8.66522	-3.93079	0.00133354	0.00707993	-1.49415
LPCAT3	-1.44266	8.39676	-3.89511	0.00143418	0.00746937	-1.56687
HADHA	-1.15362	9.75308	-3.85975	0.00154156	0.00788038	-1.63898
PLIN2	-1.25709	8.22795	-3.84558	0.00158681	0.00804192	-1.66786
ALOX5	1.08906	6.71983	3.84049	0.0016034	0.00809991	-1.67824
CUBN	1.28584	6.3344	3.80598	0.0017206	0.00852748	-1.74862
PRKAA1	-1.22989	8.5626	-3.79452	0.00176139	0.00866136	-1.77198
ABCB4	2.99193	7.25231	3.78707	0.00178842	0.00874808	-1.78717
MED6	-1.03083	8.05528	-3.7721	0.00184404	0.00895799	-1.81769
SEC23A	-1.14804	10.3529	-3.76955	0.00185368	0.0090002	-1.82289
SMPD4	-1.20646	8.58445	-3.72891	0.00201449	0.00953546	-1.90574
AHR	-2.26906	8.92649	-3.72101	0.00204738	0.0096379	-1.92186
PCBD1	-1.35136	8.29973	-3.71141	0.00208802	0.00978315	-1.94142
HADHB	-1.03314	8.95374	-3.71099	0.00208981	0.00978635	-1.94227
PIKFYVE	1.22717	8.86803	3.69036	0.00218002	0.0101059	-1.98431
CCNC	-1.2291	7.96378	-3.68894	0.00218638	0.0101279	-1.98721
UROS	-1.41005	9.18128	-3.59037	0.00267606	0.0117634	-2.18795
MDH1	-1.13603	8.83375	-3.58232	0.0027206	0.0119314	-2.20432
ACSL4	-1.58527	8.5397	-3.57917	0.00273825	0.0119782	-2.21074
AGT	2.39369	7.51881	3.57849	0.0027421	0.0119867	-2.21213
HSD17B4	-1.37914	8.81593	-3.54492	0.00293763	0.0126537	-2.2804
HACD1	-2.4701	6.55512	-3.5222	0.00307779	0.0131493	-2.32657
NFKB1	-1.20464	7.98046	-3.50106	0.00321432	0.0136093	-2.36953
ALDH1A1	2.40555	6.5688	3.46267	0.00347783	0.0144174	-2.44746
NCOR1	1.14863	10.1886	3.46158	0.00348562	0.0144423	-2.44967
ECI2	-1.14318	7.65323	-3.40912	0.00388192	0.0156388	-2.55602
CHKA	1.22435	8.07184	3.40013	0.00395417	0.0158722	-2.57421
CPT1A	-1.44646	8.47711	-3.39512	0.00399504	0.0159852	-2.58436
AGPAT3	-1.08371	7.39804	-3.39382	0.00400576	0.0160077	-2.587
ACACB	1.08722	7.11958	3.39297	0.00401273	0.016022	-2.58871
MYLIP	1.09573	7.51373	3.39095	0.00402939	0.016075	-2.5928
MTMR10	1.19737	8.51727	3.37542	0.00415985	0.0164577	-2.62422
PCYT1A	-1.39109	8.33123	-3.36935	0.00421202	0.0166207	-2.6365
ALDH3B1	-1.10456	8.06699	-3.36595	0.00424151	0.0167161	-2.64338
ALDH1B1	-1.91161	7.79374	-3.35733	0.00431717	0.016928	-2.6608
LSS	-1.09724	7.97092	-3.34181	0.00445685	0.017358	-2.69216
SMPD3	2.87163	8.01217	3.33046	0.0045619	0.017674	-2.7151
INPP4A	1.4359	9.10375	3.32404	0.00462239	0.0178662	-2.72806
INSIG1	-1.03729	8.02041	-3.32366	0.00462601	0.0178692	-2.72883
DECR1	-1.22127	8.17676	-3.27664	0.00509433	0.019233	-2.82366
ACSS1	1.66061	7.82883	3.26812	0.0051841	0.0195211	-2.84082
SAR1B	-1.17839	8.60992	-3.21348	0.00579822	0.0212605	-2.95068
ACOT13	-1.32569	7.46166	-3.2071	0.00587457	0.0214321	-2.9635
HMGCL	-1.03034	7.91736	-3.17851	0.00622861	0.0224159	-3.02082
LIPI	1.4976	3.65966	3.17717	0.00624571	0.0224688	-3.02351
CYP7B1	1.4531	7.21994	3.16499	0.00640348	0.0228923	-3.04792
TNFRSF21	1.57491	7.9908	3.15887	0.00648413	0.0230904	-3.06017
HPGDS	2.61344	5.21584	3.14667	0.00664801	0.0235212	-3.08458
FHL2	-2.30597	8.14015	-3.13917	0.00675082	0.0237836	-3.09958
ENPP2	-1.21384	9.65667	-3.13572	0.00679855	0.0239014	-3.10647
PLD1	1.10339	7.48148	3.08781	0.00749789	0.0257082	-3.20208
PHYH	-1.08996	6.78587	-3.03105	0.00841874	0.0281241	-3.31494
PRKAG1	-1.12363	9.16159	-3.02532	0.00851763	0.0283716	-3.32631
GNPAT	-1.07196	9.06999	-3.02321	0.00855438	0.0284412	-3.3305
IDH1	-1.24076	9.09669	-3.01618	0.00867779	0.0287552	-3.34443
HSP90AA1	-1.01263	11.0385	-3.00912	0.00880353	0.0290544	-3.35842
IDH3B	-1.13251	8.56628	-2.97718	0.00939494	0.0305413	-3.42158
ARV1	-1.16302	7.9603	-2.97552	0.00942688	0.0306162	-3.42488
PHOSPHO1	3.07407	8.28578	2.89277	0.0111523	0.0346936	-3.58773
PLBD1	1.02795	7.90092	2.87609	0.0115358	0.0356218	-3.62042
SLC44A5	3.94523	7.03882	2.82576	0.0127725	0.0384642	-3.71868
ARSJ	-2.32935	6.12302	-2.7929	0.0136485	0.0404576	-3.78256
AADAT	2.0067	8.24626	2.76412	0.0144638	0.0422881	-3.83833
PRKAA2	-1.46683	5.60283	-2.68106	0.0170894	0.0480645	-3.99818
