# Supplementary material for: Identification of two novel lipid metabolism-related long non-coding RNAs (SNHG17 and LINC00837) as potential signatures for osteosarcoma prognosis and precise treatment
Source: BMC Med Genomics. 2023 May 25;16:115. doi: 10.1186/s12920-023-01553-4 (PMC10210430; doi:10.1186/s12920-023-01553-4)
Supplement: Supplementary file 6 — Supplementary Material 6 [file 12920_2023_1553_MOESM6_ESM.xlsx]

## Sheet: corResult
lipid metabolism-related genes	lncRNAs	cor	pvalue	Regulation
YWHAH	POLR2J4	0.311339	0.00048189	postive
YWHAH	C22orf24	0.334321	0.000167502	postive
VDAC3	WT1-AS	0.359177	4.84808e-05	postive
VDAC3	MAPKAPK5-AS1	0.319689	0.000331443	postive
VDAC3	LINC00652	0.344327	0.000102962	postive
VDAC3	KCNQ1DN	0.332301	0.000184427	postive
VDAC3	ERC2-IT1	0.308206	0.000553018	postive
VDAC2	SNHG17	0.322325	0.000293843	postive
VDAC2	RPARP-AS1	0.343173	0.000108993	postive
VDAC2	AC004490.1	0.320951	0.00031291	postive
UROS	PDCD4-AS1	0.36477	3.61518e-05	postive
UROD	MAPKAPK5-AS1	0.367163	3.18323e-05	postive
UROD	LINC00623	0.378284	1.73882e-05	postive
UROD	FAM182A	0.337552	0.000143403	postive
UGDH	WT1-AS	0.409271	2.85897e-06	postive
UGDH	TCL6	0.335191	0.000160666	postive
UGDH	SMG7-AS1	0.307734	0.000564516	postive
UGDH	RNF185-AS1	0.432415	6.56456e-07	postive
UGDH	RBFADN	0.304334	0.000654191	postive
UGDH	PTGER4P2-CDK2AP2P2	0.352973	6.6713e-05	postive
UGDH	PRR34	0.316281	0.000386652	postive
UGDH	PLAC4	0.473708	3.57006e-08	postive
UGDH	NDUFB2-AS1	0.34283	0.000110851	postive
UGDH	N4BP2L2-IT2	0.326542	0.000241795	postive
UGDH	MYCNOS	0.331408	0.000192404	postive
UGDH	LINC01278	0.355176	5.9608e-05	postive
UGDH	LINC01136	0.425844	1.00807e-06	postive
UGDH	LINC00939	0.452352	1.68836e-07	postive
UGDH	LINC00894	0.344631	0.000101424	postive
UGDH	LINC00563	0.345999	9.47656e-05	postive
UGDH	LINC00474	0.363392	3.88807e-05	postive
UGDH	LINC00216	0.404362	3.85238e-06	postive
UGDH	KLF3-AS1	0.392818	7.62653e-06	postive
UGDH	KIAA0087	0.355036	6.0039e-05	postive
UGDH	HEXA-AS1	0.389261	9.36505e-06	postive
UGDH	HCG9	0.380834	1.50901e-05	postive
UGDH	HAND2-AS1	0.336622	0.000149987	postive
UGDH	GUSBP11	0.390675	8.63348e-06	postive
UGDH	GS1-600G8.3	0.423512	1.17125e-06	postive
UGDH	GK-AS1	0.324679	0.000263637	postive
UGDH	FLJ13224	0.334916	0.0001628	postive
UGDH	FAM66D	0.320078	0.000325618	postive
UGDH	FAM224A	0.390304	8.82006e-06	postive
UGDH	FAM182A	0.350848	7.4309e-05	postive
UGDH	ERC2-IT1	0.377584	1.80753e-05	postive
UGDH	EGOT	0.472536	3.89869e-08	postive
UGDH	DTX2P1-UPK3BP1-PMS2P11	0.38581	1.14037e-05	postive
UGDH	DLEU2L	0.354652	6.1231e-05	postive
UGDH	DLEU1	0.378728	1.69656e-05	postive
UGDH	DKFZP434A062	0.348126	8.52198e-05	postive
UGDH	DBET	0.498104	5.28782e-09	postive
UGDH	CT62	0.451631	1.77609e-07	postive
UGDH	CPS1-IT1	0.450253	1.95599e-07	postive
UGDH	CADM3-AS1	0.342209	0.000114292	postive
UGDH	C7orf69	0.302968	0.000693773	postive
UGDH	C5orf66	0.344687	0.000101141	postive
UGDH	C22orf24	0.346994	9.01832e-05	postive
UGDH	BPESC1	0.320766	0.000315572	postive
UGDH	ATXN8OS	0.453497	1.55755e-07	postive
UGDH	AGAP11	0.389829	9.06438e-06	postive
UGDH	ADD3-AS1	0.338887	0.000134421	postive
UGDH	AC004490.1	0.385122	1.18573e-05	postive
UGCG	SMG7-AS1	0.331628	0.000190413	postive
UGCG	MCM3AP-AS1	0.35145	7.20772e-05	postive
UGCG	LINC00588	0.311363	0.000481394	postive
UGCG	LINC00472	0.310379	0.00050273	postive
UGCG	KLF3-AS1	0.355797	5.77385e-05	postive
UGCG	KIAA0087	0.406791	3.32586e-06	postive
UGCG	HCP5	0.374443	2.14812e-05	postive
UGCG	HCG18	0.308354	0.000549431	postive
UGCG	FAM215A	0.306119	0.000605602	postive
UGCG	DTX2P1-UPK3BP1-PMS2P11	0.344432	0.000102425	postive
UGCG	DLEU2L	0.364462	3.67452e-05	postive
UGCG	DLEU2	0.429309	8.04935e-07	postive
UGCG	CPS1-IT1	0.370907	2.60337e-05	postive
UGCG	C22orf24	0.441027	3.69044e-07	postive
UGCG	BPESC1	0.404794	3.7534e-06	postive
UGCG	ANKRD10-IT1	0.404692	3.77643e-06	postive
UGCG	AC004490.1	0.34468	0.000101177	postive
TXNRD1	TCL6	0.305402	0.000624715	postive
TXNRD1	RFPL3S	0.3108	0.000493496	postive
TXNRD1	HEXA-AS1	0.321827	0.000300622	postive
TXNRD1	HAND2-AS1	0.463353	7.68456e-08	postive
TXNRD1	DLEU2L	0.309404	0.000524738	postive
TXNRD1	DLEU2	0.391687	8.14342e-06	postive
TXNRD1	CPS1-IT1	0.319804	0.000329713	postive
TXNRD1	C22orf24	0.340983	0.000121366	postive
TXNRD1	BPESC1	0.369028	2.88074e-05	postive
TXNRD1	AC004490.1	0.371342	2.54285e-05	postive
TSPO	ACVR2B-AS1	-0.33136	0.000192845	negative
TRADD	TP53TG1	0.346589	9.20213e-05	postive
TRADD	THAP9-AS1	-0.382824	1.34978e-05	negative
TRADD	PTGER4P2-CDK2AP2P2	0.332395	0.000183605	postive
TRADD	PRR34	0.324915	0.000260763	postive
TRADD	PLAC4	0.354243	6.25265e-05	postive
TRADD	HCG9	0.302836	0.000697713	postive
TRADD	EGOT	0.301347	0.000743597	postive
TRADD	CYB561D2	0.334576	0.00016547	postive
TRADD	AGAP11	0.315099	0.000407695	postive
TNFRSF21	ATXN8OS	0.306181	0.000603986	postive
TBXAS1	MEG3	-0.31195	0.000469059	negative
TBXAS1	MCM3AP-AS1	-0.301476	0.00073949	negative
TBXAS1	HLA-F-AS1	-0.34393	0.000105	negative
TBXAS1	CYB561D2	0.316758	0.000378447	postive
SYNJ2	TCL6	0.303325	0.00068322	postive
SYNJ2	SMG7-AS1	0.313929	0.000429568	postive
SYNJ2	SMAD5-AS1	0.301579	0.000736255	postive
SYNJ2	RNF185-AS1	0.414586	2.0589e-06	postive
SYNJ2	RBFADN	0.324688	0.000263518	postive
SYNJ2	PTGER4P2-CDK2AP2P2	0.32515	0.000257945	postive
SYNJ2	PRR34	0.484956	1.50771e-08	postive
SYNJ2	PLAC4	0.327563	0.000230549	postive
SYNJ2	NBR2	0.305665	0.000617642	postive
SYNJ2	MYCNOS	0.323313	0.000280788	postive
SYNJ2	MEG3	0.330454	0.000201286	postive
SYNJ2	LINC01278	0.392034	7.98129e-06	postive
SYNJ2	LINC01136	0.433121	6.26552e-07	postive
SYNJ2	LINC00963	0.377603	1.80562e-05	postive
SYNJ2	LINC00939	0.320919	0.000313368	postive
SYNJ2	LINC00574	0.367735	3.08745e-05	postive
SYNJ2	LINC00115	0.342367	0.000113404	postive
SYNJ2	KLF3-AS1	0.355632	5.82281e-05	postive
SYNJ2	KIAA0087	0.440801	3.74738e-07	postive
SYNJ2	INE1	0.473192	3.71123e-08	postive
SYNJ2	HCG18	0.306092	0.000606316	postive
SYNJ2	GUSBP11	0.361236	4.35435e-05	postive
SYNJ2	GSN-AS1	0.325709	0.000251342	postive
SYNJ2	GS1-600G8.3	0.342703	0.000111546	postive
SYNJ2	FOXN3-AS2	0.314795	0.000413285	postive
SYNJ2	FLJ13224	0.332831	0.000179844	postive
SYNJ2	FAM66D	0.376727	1.89503e-05	postive
SYNJ2	FAM215A	0.401063	4.69475e-06	postive
SYNJ2	ERC2-IT1	0.394143	7.06052e-06	postive
SYNJ2	EGOT	0.311818	0.000471799	postive
SYNJ2	DTX2P1-UPK3BP1-PMS2P11	0.341412	0.000118842	postive
SYNJ2	DLEU2L	0.386753	1.08082e-05	postive
SYNJ2	DKFZP434A062	0.423458	1.1753e-06	postive
SYNJ2	DIAPH2-AS1	0.414379	2.08563e-06	postive
SYNJ2	DGCR5	0.420154	1.45093e-06	postive
SYNJ2	DBET	0.311653	0.000475256	postive
SYNJ2	CT62	0.404011	3.9348e-06	postive
SYNJ2	CPS1-IT1	0.394937	6.74075e-06	postive
SYNJ2	CADM3-AS1	0.386714	1.08323e-05	postive
SYNJ2	C5orf66	0.359283	4.82147e-05	postive
SYNJ2	C22orf24	0.403567	4.04116e-06	postive
SYNJ2	BPESC1	0.369241	2.84784e-05	postive
SYNJ2	ATXN8OS	0.401408	4.59932e-06	postive
SYNJ2	AGAP11	0.312422	0.000459335	postive
SYNJ2	ADD3-AS1	0.331922	0.000187776	postive
SYNJ2	ACVR2B-AS1	0.312668	0.000454354	postive
SYNJ2	AC007389.3	0.319649	0.000332045	postive
SYNJ2	AC007292.3	0.386926	1.07024e-05	postive
SYNJ2	AC004490.1	0.333588	0.000173471	postive
SUCLG2	HEXA-AS1	0.311497	0.000478533	postive
SUCLG2	CPS1-IT1	0.360191	4.59869e-05	postive
SUCLG2	C22orf24	0.395879	6.37904e-06	postive
SUCLG2	BPESC1	0.347898	8.61968e-05	postive
SUCLG2	AC004490.1	0.36121	4.36031e-05	postive
SUCLA2	HEXA-AS1	0.409442	2.82924e-06	postive
SUCLA2	HAND2-AS1	0.385899	1.13458e-05	postive
SUCLA2	DLEU2L	0.320146	0.000324618	postive
SUCLA2	DLEU2	0.562958	1.4854e-11	postive
SUCLA2	DLEU1	0.471152	4.32411e-08	postive
STS	WT1-AS	0.389258	9.36631e-06	postive
STS	TCL6	0.363023	3.96447e-05	postive
STS	RNF185-AS1	0.463911	7.3784e-08	postive
STS	RBFADN	0.353811	6.3923e-05	postive
STS	PTGER4P2-CDK2AP2P2	0.394514	6.90943e-06	postive
STS	PRR34	0.373696	2.23752e-05	postive
STS	PLAC4	0.459749	9.97585e-08	postive
STS	PART1	0.38652	1.09528e-05	postive
STS	N4BP2L2-IT2	0.305901	0.000611369	postive
STS	MYCNOS	0.359834	4.68513e-05	postive
STS	LINC01278	0.397725	5.72282e-06	postive
STS	LINC01136	0.364856	3.59876e-05	postive
STS	LINC00963	0.301524	0.000737981	postive
STS	LINC00939	0.318947	0.000342802	postive
STS	LINC00894	0.338716	0.000135539	postive
STS	LINC00652	0.372845	2.34364e-05	postive
STS	LINC00574	0.351609	7.1498e-05	postive
STS	LINC00563	0.410292	2.68537e-06	postive
STS	LINC00474	0.39807	5.6074e-06	postive
STS	LINC00216	0.473199	3.70936e-08	postive
STS	KIAA0087	0.322039	0.000297717	postive
STS	HCG9	0.331142	0.00019484	postive
STS	GUSBP11	0.413321	2.22736e-06	postive
STS	GSN-AS1	0.3272	0.000234493	postive
STS	GS1-600G8.3	0.42595	1.00122e-06	postive
STS	GK-AS1	0.375668	2.00862e-05	postive
STS	FAM182A	0.313553	0.000436823	postive
STS	EGOT	0.401894	4.46761e-06	postive
STS	DTX2P1-UPK3BP1-PMS2P11	0.440894	3.72384e-07	postive
STS	DLEU2L	0.300639	0.000766363	postive
STS	DKFZP434A062	0.442533	3.33142e-07	postive
STS	DIAPH2-AS1	0.355411	5.88936e-05	postive
STS	DBET	0.328455	0.000221121	postive
STS	CT62	0.4017	4.51967e-06	postive
STS	CADM3-AS1	0.353457	6.50862e-05	postive
STS	C5orf66	0.400909	4.73812e-06	postive
STS	ATXN8OS	0.422369	1.26013e-06	postive
STS	ANKRD10-IT1	0.319175	0.000339268	postive
STS	AGAP11	0.374468	2.14519e-05	postive
STS	AC007389.3	0.378949	1.67595e-05	postive
SPTLC3	WT1-AS	0.385621	1.15267e-05	postive
SPTLC3	TCL6	0.324373	0.000267384	postive
SPTLC3	RNF185-AS1	0.367175	3.1811e-05	postive
SPTLC3	RFPL1S	0.317638	0.00036373	postive
SPTLC3	RBFADN	0.415159	1.98665e-06	postive
SPTLC3	PTGER4P2-CDK2AP2P2	0.422008	1.28954e-06	postive
SPTLC3	PRR34	0.451233	1.82641e-07	postive
SPTLC3	PRORY	0.404969	3.71386e-06	postive
SPTLC3	PLAC4	0.411345	2.51694e-06	postive
SPTLC3	PART1	0.464214	7.21707e-08	postive
SPTLC3	NDUFB2-AS1	0.334551	0.000165668	postive
SPTLC3	NBR2	0.362189	4.14216e-05	postive
SPTLC3	N4BP2L2-IT2	0.310748	0.000494623	postive
SPTLC3	LINC01278	0.379929	1.58711e-05	postive
SPTLC3	LINC01136	0.307368	0.000573602	postive
SPTLC3	LINC00652	0.311779	0.000472615	postive
SPTLC3	LINC00563	0.32672	0.000239802	postive
SPTLC3	LINC00216	0.377023	1.86431e-05	postive
SPTLC3	IGF2-AS	0.326649	0.000240597	postive
SPTLC3	HCG9	0.323235	0.000281797	postive
SPTLC3	HCG18	0.373185	2.30073e-05	postive
SPTLC3	GUSBP11	0.427252	9.2023e-07	postive
SPTLC3	GSN-AS1	0.315823	0.000394694	postive
SPTLC3	GS1-600G8.3	0.316307	0.000386199	postive
SPTLC3	GK-AS1	0.351328	7.25235e-05	postive
SPTLC3	FLJ13224	0.360689	4.48069e-05	postive
SPTLC3	FAM182A	0.385761	1.14354e-05	postive
SPTLC3	ERC2-IT1	0.370637	2.64155e-05	postive
SPTLC3	DLEU2L	0.399409	5.18008e-06	postive
SPTLC3	DKFZP434A062	0.3827	1.35925e-05	postive
SPTLC3	DGCR5	0.327777	0.000228256	postive
SPTLC3	DBET	0.427006	9.35029e-07	postive
SPTLC3	CT62	0.477314	2.71724e-08	postive
SPTLC3	CPS1-IT1	0.33484	0.000163397	postive
SPTLC3	CADM3-AS1	0.306868	0.000586211	postive
SPTLC3	C5orf66	0.351077	7.34522e-05	postive
SPTLC3	ATXN8OS	0.376691	1.89879e-05	postive
SPTLC3	AGAP11	0.424996	1.06476e-06	postive
SPTLC3	AC007389.3	0.336227	0.000152866	postive
SPTLC2	WT1-AS	0.377245	1.84162e-05	postive
SPTLC2	TCL6	0.348857	8.21488e-05	postive
SPTLC2	RNF185-AS1	0.391548	8.20909e-06	postive
SPTLC2	PTGER4P2-CDK2AP2P2	0.335185	0.000160715	postive
SPTLC2	PRR34	0.301851	0.000727742	postive
SPTLC2	PLAC4	0.389736	9.11295e-06	postive
SPTLC2	PART1	0.354374	6.21093e-05	postive
SPTLC2	NDUFB2-AS1	0.374996	2.08398e-05	postive
SPTLC2	MYCNOS	0.315044	0.000408701	postive
SPTLC2	MCF2L-AS1	0.317828	0.000360611	postive
SPTLC2	LINC01136	0.354824	6.06932e-05	postive
SPTLC2	LINC00939	0.417414	1.72495e-06	postive
SPTLC2	LINC00652	0.300123	0.000783354	postive
SPTLC2	LINC00563	0.321506	0.000305081	postive
SPTLC2	LINC00474	0.343716	0.000106118	postive
SPTLC2	LINC00216	0.355359	5.90501e-05	postive
SPTLC2	KIAA0087	0.3382	0.000138975	postive
SPTLC2	HEXA-AS1	0.45576	1.32693e-07	postive
SPTLC2	HCG9	0.330658	0.000199354	postive
SPTLC2	HAND2-AS1	0.326532	0.000241904	postive
SPTLC2	GUSBP11	0.346389	9.29426e-05	postive
SPTLC2	GS1-600G8.3	0.384713	1.21344e-05	postive
SPTLC2	FLJ13224	0.335476	0.000158488	postive
SPTLC2	FAM224A	0.335664	0.000157062	postive
SPTLC2	FAM182A	0.40956	2.80875e-06	postive
SPTLC2	ERC2-IT1	0.302997	0.000692925	postive
SPTLC2	EGOT	0.471623	4.17464e-08	postive
SPTLC2	DTX2P1-UPK3BP1-PMS2P11	0.385343	1.17096e-05	postive
SPTLC2	DLEU2L	0.391298	8.32865e-06	postive
SPTLC2	DLEU1	0.387435	1.03966e-05	postive
SPTLC2	DKFZP434A062	0.326561	0.000241583	postive
SPTLC2	DIAPH2-AS1	0.359351	4.80436e-05	postive
SPTLC2	DBET	0.456411	1.26686e-07	postive
SPTLC2	CT62	0.425556	1.02699e-06	postive
SPTLC2	CPS1-IT1	0.461288	8.92686e-08	postive
SPTLC2	CADM3-AS1	0.311198	0.000484908	postive
SPTLC2	C5orf66	0.345841	9.55134e-05	postive
SPTLC2	C22orf24	0.398122	5.59038e-06	postive
SPTLC2	BPESC1	0.347794	8.66476e-05	postive
SPTLC2	ATXN8OS	0.479162	2.35963e-08	postive
SPTLC2	AGAP11	0.352211	6.93475e-05	postive
SPTLC2	ADD3-AS1	0.32279	0.000287622	postive
SPTLC2	AC004490.1	0.411144	2.54821e-06	postive
SORBS1	WT1-AS	0.572156	5.80437e-12	postive
SORBS1	SMG7-AS1	0.364418	3.68309e-05	postive
SORBS1	RPARP-AS1	0.385438	1.16464e-05	postive
SORBS1	RNF185-AS1	0.316648	0.000380316	postive
SORBS1	RHPN1-AS1	0.337998	0.00014034	postive
SORBS1	RBFADN	0.417318	1.73541e-06	postive
SORBS1	PTGER4P2-CDK2AP2P2	0.425344	1.04111e-06	postive
SORBS1	PRR34	0.46178	8.615e-08	postive
SORBS1	PLAC4	0.481729	1.9368e-08	postive
SORBS1	PDCD4-AS1	0.333299	0.000175877	postive
SORBS1	PART1	0.336286	0.000152437	postive
SORBS1	NBR2	0.455028	1.39774e-07	postive
SORBS1	N4BP2L2-IT2	0.439709	4.03454e-07	postive
SORBS1	MYCNOS	0.371754	2.48667e-05	postive
SORBS1	MEG3	0.387255	1.05038e-05	postive
SORBS1	MCM3AP-AS1	0.426787	9.48417e-07	postive
SORBS1	MCF2L-AS1	0.498253	5.22393e-09	postive
SORBS1	LINC01278	0.348469	8.37647e-05	postive
SORBS1	LINC01136	0.32412	0.000270537	postive
SORBS1	LINC00939	0.317144	0.000371919	postive
SORBS1	LINC00894	0.461183	8.99534e-08	postive
SORBS1	LINC00652	0.410887	2.58887e-06	postive
SORBS1	LINC00574	0.301784	0.000729835	postive
SORBS1	LINC00563	0.403545	4.04659e-06	postive
SORBS1	LINC00474	0.301241	0.00074696	postive
SORBS1	LINC00472	0.375468	2.03083e-05	postive
SORBS1	LINC00216	0.374471	2.14474e-05	postive
SORBS1	KIAA0087	0.320743	0.000315898	postive
SORBS1	INE1	0.431846	6.81539e-07	postive
SORBS1	IGF2-AS	0.357978	5.15928e-05	postive
SORBS1	HLA-F-AS1	0.39064	8.65055e-06	postive
SORBS1	HCG9	0.424631	1.09005e-06	postive
SORBS1	HCG18	0.34947	7.96576e-05	postive
SORBS1	GUSBP11	0.362655	4.04202e-05	postive
SORBS1	GSN-AS1	0.31084	0.000492629	postive
SORBS1	GK-AS1	0.421114	1.36513e-06	postive
SORBS1	FAM66D	0.327247	0.000233975	postive
SORBS1	FAM224A	0.371686	2.49589e-05	postive
SORBS1	FAM182A	0.331723	0.000189556	postive
SORBS1	FAM106A	0.353317	6.55516e-05	postive
SORBS1	ERC2-IT1	0.486606	1.32514e-08	postive
SORBS1	ENTPD1-AS1	0.36737	3.14823e-05	postive
SORBS1	EGOT	0.422564	1.24454e-06	postive
SORBS1	DTX2P1-UPK3BP1-PMS2P11	0.448382	2.22813e-07	postive
SORBS1	DLEU2L	0.313936	0.000429446	postive
SORBS1	DKFZP434A062	0.396083	6.30311e-06	postive
SORBS1	DGCR5	0.335701	0.000156783	postive
SORBS1	DBET	0.393831	7.19014e-06	postive
SORBS1	CT62	0.339822	0.000128443	postive
SORBS1	CADM3-AS1	0.412704	2.31423e-06	postive
SORBS1	C5orf66	0.45591	1.31286e-07	postive
SORBS1	C22orf24	0.319085	0.000340661	postive
SORBS1	ATXN8OS	0.323067	0.000283984	postive
SORBS1	ANKRD10-IT1	0.470163	4.65481e-08	postive
SORBS1	AGAP11	0.4485	2.20985e-07	postive
SORBS1	ADD3-AS1	0.421416	1.33908e-06	postive
SORBS1	ACVR2B-AS1	0.376166	1.95448e-05	postive
SORBS1	AC007389.3	0.34431	0.000103045	postive
SORBS1	AC007292.3	0.327005	0.000236638	postive
SOAT1	RFPL3S	0.332428	0.000183319	postive
SOAT1	KIAA0087	0.368481	2.96641e-05	postive
SOAT1	HEXA-AS1	0.470459	4.55325e-08	postive
SOAT1	HCP5	0.305336	0.000626488	postive
SOAT1	HAND2-AS1	0.309547	0.000521475	postive
SOAT1	ENTPD1-AS1	0.344547	0.000101842	postive
SOAT1	DLEU2L	0.372238	2.42221e-05	postive
SOAT1	DLEU2	0.38843	9.82187e-06	postive
SOAT1	CPS1-IT1	0.316366	0.000385182	postive
SOAT1	C22orf24	0.316857	0.000376754	postive
SOAT1	BPESC1	0.423394	1.18019e-06	postive
SMPD3	MEG3	-0.322398	0.000292851	negative
SMPD3	LINC00837	0.361632	4.26501e-05	postive
SMPD1	TCL6	0.328807	0.000217498	postive
SMPD1	RNF185-AS1	0.317871	0.00035991	postive
SMPD1	PTGER4P2-CDK2AP2P2	0.419355	1.52626e-06	postive
SMPD1	PRR34	0.380479	1.53916e-05	postive
SMPD1	PLAC4	0.358856	4.92978e-05	postive
SMPD1	N4BP2L2-IT2	0.327435	0.000231937	postive
SMPD1	LINC01136	0.353653	6.44394e-05	postive
SMPD1	LINC00652	0.309738	0.00051711	postive
SMPD1	LINC00563	0.391586	8.19111e-06	postive
SMPD1	LINC00474	0.415516	1.94292e-06	postive
SMPD1	LINC00216	0.348179	8.49938e-05	postive
SMPD1	HCG9	0.40005	4.98689e-06	postive
SMPD1	GUSBP11	0.341595	0.000117784	postive
SMPD1	GSN-AS1	0.317249	0.000370169	postive
SMPD1	GS1-600G8.3	0.352297	6.90466e-05	postive
SMPD1	FLJ13224	0.38014	1.56859e-05	postive
SMPD1	FAM182A	0.413921	2.14589e-06	postive
SMPD1	DKFZP434A062	0.310687	0.000495952	postive
SMPD1	DBET	0.335741	0.000156481	postive
SMPD1	CT62	0.415466	1.94888e-06	postive
SMPD1	CPS1-IT1	0.324673	0.00026371	postive
SMPD1	AGAP11	0.315494	0.00040056	postive
SERINC1	THAP9-AS1	0.369479	2.81167e-05	postive
SERINC1	LINC00588	0.333578	0.000173556	postive
SERINC1	KLF3-AS1	0.354992	6.01733e-05	postive
SERINC1	HEXA-AS1	0.402167	4.39526e-06	postive
SERINC1	HAND2-AS1	0.325846	0.000249746	postive
SERINC1	DLEU2	0.348841	8.22138e-05	postive
SERINC1	CPS1-IT1	0.363887	3.78799e-05	postive
SERINC1	C22orf24	0.428005	8.76322e-07	postive
SERINC1	BPESC1	0.396876	6.01622e-06	postive
SERINC1	ARMC2-AS1	0.373209	2.29773e-05	postive
SERINC1	AC004490.1	0.328519	0.000220459	postive
SEC24D	THAP9-AS1	0.360973	4.41465e-05	postive
SEC24D	RNF185-AS1	0.317981	0.000358127	postive
SEC24D	KCNQ1OT1	0.336523	0.000150701	postive
SEC24D	HEXA-AS1	0.42597	9.99901e-07	postive
SEC24D	HAND2-AS1	0.30813	0.000554848	postive
SEC24D	FLJ13224	0.30436	0.000653476	postive
SEC24D	DLEU2	0.39801	5.62725e-06	postive
SEC24D	DBET	0.306767	0.000588814	postive
SEC24D	CPS1-IT1	0.440479	3.83002e-07	postive
SEC24D	C22orf24	0.322923	0.00028587	postive
SEC24D	BPESC1	0.389661	9.15209e-06	postive
SEC24D	ATXN8OS	0.321725	0.000302028	postive
SEC24D	AC004490.1	0.422129	1.27959e-06	postive
SEC23A	THAP9-AS1	0.405634	3.56747e-06	postive
SEC23A	MYCNOS	0.308447	0.000547225	postive
SEC23A	MEG3	0.300152	0.000782369	postive
SEC23A	LINC00588	0.314501	0.000418755	postive
SEC23A	LINC00472	0.41391	2.1473e-06	postive
SEC23A	KLF3-AS1	0.405076	3.68994e-06	postive
SEC23A	KCNQ1OT1	0.355999	5.7141e-05	postive
SEC23A	HEXA-AS1	0.529058	3.73842e-10	postive
SEC23A	HAND2-AS1	0.339906	0.000127921	postive
SEC23A	FAM66D	0.335605	0.000157507	postive
SEC23A	FAM224A	0.430818	7.292e-07	postive
SEC23A	ENTPD1-AS1	0.414301	2.09583e-06	postive
SEC23A	DLEU2L	0.327993	0.000225961	postive
SEC23A	DLEU2	0.37403	2.19714e-05	postive
SEC23A	DBET	0.30773	0.000564631	postive
SEC23A	CPS1-IT1	0.418083	1.6539e-06	postive
SEC23A	C22orf24	0.438555	4.36104e-07	postive
SEC23A	BPESC1	0.43586	5.22387e-07	postive
SEC23A	ATXN8OS	0.303067	0.000690824	postive
SEC23A	ARMC2-AS1	0.41492	2.0165e-06	postive
SEC23A	AC004490.1	0.481501	1.9712e-08	postive
SDHA	LINC00652	0.320827	0.000314686	postive
SDHA	FAM224A	0.315616	0.00039836	postive
SDHA	ADD3-AS1	0.341267	0.000119695	postive
SAR1B	THAP9-AS1	0.302043	0.000721804	postive
SAR1B	RFPL3S	0.408642	2.97114e-06	postive
SAR1B	HEXA-AS1	0.360803	4.45415e-05	postive
SAR1B	HAND2-AS1	0.307205	0.000577698	postive
SAR1B	FAM224A	0.329589	0.000209659	postive
SAR1B	DLEU2L	0.344962	9.97722e-05	postive
SAR1B	DLEU2	0.326033	0.000247583	postive
SAR1B	DLEU1	0.323	0.000284869	postive
SAR1B	BPESC1	0.404495	3.82168e-06	postive
S100A10	LINC00963	0.361337	4.33145e-05	postive
S100A10	KIAA0087	0.335698	0.000156806	postive
S100A10	FAM224A	0.386063	1.12409e-05	postive
S100A10	CPS1-IT1	0.371341	2.5429e-05	postive
S100A10	BPESC1	0.400975	4.71952e-06	postive
S100A10	AC004490.1	0.372678	2.36508e-05	postive
RUFY1	WT1-AS	0.315197	0.00040592	postive
RUFY1	RPARP-AS1	0.319148	0.000339692	postive
RUFY1	RNF185-AS1	0.321734	0.000301911	postive
RUFY1	PTGER4P2-CDK2AP2P2	0.33734	0.000144878	postive
RUFY1	PRR34	0.331102	0.000195215	postive
RUFY1	PLAC4	0.3864	1.10276e-05	postive
RUFY1	PART1	0.345843	9.55043e-05	postive
RUFY1	N4BP2L2-IT2	0.327281	0.000233603	postive
RUFY1	MAPKAPK5-AS1	0.336757	0.000149012	postive
RUFY1	LINC00939	0.311405	0.000480487	postive
RUFY1	LINC00667	0.32312	0.000283295	postive
RUFY1	LINC00652	0.332589	0.000181926	postive
RUFY1	LINC00623	0.346497	9.24427e-05	postive
RUFY1	HLA-F-AS1	0.3013	0.000745088	postive
RUFY1	HEXA-AS1	0.355202	5.95274e-05	postive
RUFY1	HCG9	0.390277	8.8335e-06	postive
RUFY1	GUSBP11	0.353472	6.50368e-05	postive
RUFY1	FAM224A	0.309835	0.000514922	postive
RUFY1	FAM182A	0.410935	2.58131e-06	postive
RUFY1	EGOT	0.302358	0.000712149	postive
RUFY1	C5orf66	0.302226	0.000716182	postive
RUFY1	ATXN8OS	0.327735	0.000228698	postive
RUFY1	AGAP11	0.366994	3.2121e-05	postive
RUFY1	ADD3-AS1	0.315358	0.000403009	postive
RUFY1	ACVR2B-AS1	0.355568	5.84221e-05	postive
RAP1GDS1	THAP9-AS1	0.543167	1.02002e-10	postive
RAP1GDS1	NBR2	0.327839	0.000227598	postive
RAP1GDS1	MEG3	0.382902	1.34389e-05	postive
RAP1GDS1	MCF2L-AS1	0.359631	4.735e-05	postive
RAP1GDS1	LINC00667	0.353498	6.49502e-05	postive
RAP1GDS1	LINC00588	0.354748	6.09294e-05	postive
RAP1GDS1	LINC00472	0.432888	6.36301e-07	postive
RAP1GDS1	LINC00342	0.333563	0.000173676	postive
RAP1GDS1	HEXA-AS1	0.327292	0.00023348	postive
RAP1GDS1	HAND2-AS1	0.328359	0.00022212	postive
RAP1GDS1	FAM224A	0.381538	1.45076e-05	postive
RAP1GDS1	ERC2-IT1	0.355225	5.94596e-05	postive
RAP1GDS1	ENTPD1-AS1	0.335278	0.000160001	postive
RAP1GDS1	DLEU1	0.350405	7.59907e-05	postive
RAP1GDS1	C22orf24	0.343134	0.000109207	postive
RAP1GDS1	AGAP11	0.326941	0.000237337	postive
RAP1GDS1	AC004490.1	0.308441	0.000547357	postive
RAN	THAP9-AS1	0.361663	4.25814e-05	postive
RAN	SNHG17	0.469793	4.78461e-08	postive
RAN	MAPKAPK5-AS1	0.338044	0.000140026	postive
RAN	ARMC2-AS1	0.30896	0.000535067	postive
RAB14	THAP9-AS1	0.476489	2.89317e-08	postive
RAB14	RNF185-AS1	0.320988	0.000312385	postive
RAB14	MCM3AP-AS1	0.365822	3.41895e-05	postive
RAB14	LINC00588	0.372837	2.34463e-05	postive
RAB14	LINC00472	0.308979	0.00053462	postive
RAB14	LINC00342	0.380833	1.50909e-05	postive
RAB14	KLF3-AS1	0.395793	6.41136e-06	postive
RAB14	HEXA-AS1	0.441653	3.53702e-07	postive
RAB14	HCG18	0.318246	0.000353861	postive
RAB14	HAND2-AS1	0.353471	6.50399e-05	postive
RAB14	DTX2P1-UPK3BP1-PMS2P11	0.351701	7.11648e-05	postive
RAB14	DLEU2L	0.325831	0.000249923	postive
RAB14	DLEU2	0.435665	5.29201e-07	postive
RAB14	CPS1-IT1	0.433926	5.94057e-07	postive
RAB14	C22orf24	0.444614	2.88958e-07	postive
RAB14	BPESC1	0.422909	1.21738e-06	postive
RAB14	ARMC2-AS1	0.332597	0.00018185	postive
RAB14	AC004490.1	0.426978	9.36725e-07	postive
PTPN11	WT1-AS	0.379076	1.66411e-05	postive
PTPN11	THAP9-AS1	0.396318	6.21707e-06	postive
PTPN11	TCL6	0.362006	4.18226e-05	postive
PTPN11	RNF185-AS1	0.467694	5.58968e-08	postive
PTPN11	RFPL3S	0.342812	0.000110952	postive
PTPN11	RBFADN	0.390389	8.77687e-06	postive
PTPN11	PTGER4P2-CDK2AP2P2	0.354612	6.13557e-05	postive
PTPN11	PLAC4	0.403572	4.03996e-06	postive
PTPN11	PART1	0.366644	3.27247e-05	postive
PTPN11	NOP14-AS1	0.311394	0.000480728	postive
PTPN11	NDUFB2-AS1	0.311821	0.000471733	postive
PTPN11	NBR2	0.310978	0.000489646	postive
PTPN11	N4BP2L2-IT2	0.383751	1.2812e-05	postive
PTPN11	MYCNOS	0.353232	6.58376e-05	postive
PTPN11	MCM3AP-AS1	0.30689	0.00058566	postive
PTPN11	MCF2L-AS1	0.324483	0.000266031	postive
PTPN11	LINC01278	0.31263	0.000455118	postive
PTPN11	LINC01136	0.399433	5.17271e-06	postive
PTPN11	LINC00939	0.381748	1.43378e-05	postive
PTPN11	LINC00894	0.399225	5.23704e-06	postive
PTPN11	LINC00652	0.309798	0.000515757	postive
PTPN11	LINC00588	0.355004	6.01348e-05	postive
PTPN11	LINC00563	0.327276	0.000233662	postive
PTPN11	LINC00472	0.383647	1.28872e-05	postive
PTPN11	KLF3-AS1	0.328328	0.000222443	postive
PTPN11	KIAA0087	0.325271	0.000256505	postive
PTPN11	HEXA-AS1	0.518418	9.57794e-10	postive
PTPN11	HAND2-AS1	0.595328	4.7602e-13	postive
PTPN11	GUSBP11	0.314786	0.000413442	postive
PTPN11	GS1-600G8.3	0.418017	1.66072e-06	postive
PTPN11	GK-AS1	0.38628	1.11032e-05	postive
PTPN11	FLJ13224	0.432692	6.44582e-07	postive
PTPN11	FAM66D	0.304745	0.000642709	postive
PTPN11	FAM224A	0.417113	1.75795e-06	postive
PTPN11	FAM215A	0.327222	0.00023425	postive
PTPN11	FAM182A	0.365414	3.49377e-05	postive
PTPN11	ERC2-IT1	0.46981	4.77856e-08	postive
PTPN11	ENTPD1-AS1	0.55058	5.03013e-11	postive
PTPN11	EGOT	0.333538	0.000173884	postive
PTPN11	DTX2P1-UPK3BP1-PMS2P11	0.30542	0.000624218	postive
PTPN11	DLEU2L	0.470457	4.554e-08	postive
PTPN11	DLEU2	0.432095	6.70479e-07	postive
PTPN11	DLEU1	0.385869	1.13653e-05	postive
PTPN11	DKFZP434A062	0.337963	0.00014058	postive
PTPN11	DIAPH2-AS1	0.319943	0.000327636	postive
PTPN11	DBET	0.360682	4.48239e-05	postive
PTPN11	CT62	0.426434	9.70354e-07	postive
PTPN11	CPS1-IT1	0.482969	1.75962e-08	postive
PTPN11	CADM3-AS1	0.303729	0.000671472	postive
PTPN11	C5orf66	0.459173	1.03973e-07	postive
PTPN11	C22orf24	0.465633	6.50533e-08	postive
PTPN11	BPESC1	0.432674	6.45352e-07	postive
PTPN11	ATXN8OS	0.560798	1.84445e-11	postive
PTPN11	AGAP11	0.351625	7.14419e-05	postive
PTPN11	AC007389.3	0.379898	1.58982e-05	postive
PTPN11	AC004490.1	0.467842	5.52892e-08	postive
PTGS1	GUSBP11	0.316411	0.000384399	postive
PTGS1	EGOT	0.310139	0.000508068	postive
PTGIS	RBFADN	0.435043	5.51594e-07	postive
PTGIS	PTGER4P2-CDK2AP2P2	0.304079	0.000661428	postive
PTGIS	PRR34	0.32306	0.000284074	postive
PTGIS	PLAC4	0.327955	0.000226361	postive
PTGIS	LINC00921	0.316732	0.00037889	postive
PTGIS	LINC00588	0.355469	5.87183e-05	postive
PTGIS	INE1	0.322055	0.000297501	postive
PTGIS	GUSBP11	0.327354	0.00023281	postive
PTGIS	GK-AS1	0.381669	1.44014e-05	postive
PTGIS	ERC2-IT1	0.315399	0.000402254	postive
PTGIS	DBET	0.339854	0.000128246	postive
PTGIS	C5orf66	0.314945	0.000410518	postive
PTGIS	ANKRD10-IT1	0.343127	0.000109244	postive
PTGIS	AGAP11	0.384659	1.2172e-05	postive
PTGES3	THAP9-AS1	0.421171	1.36019e-06	postive
PTGES3	SNHG17	0.443316	3.15806e-07	postive
PTGES3	HAND2-AS1	0.354009	6.32787e-05	postive
PTGES3	DLEU2	0.321831	0.000300567	postive
PTGES3	C22orf24	0.320152	0.000324536	postive
PTGES3	ARMC2-AS1	0.313747	0.000433081	postive
PRKD3	THAP9-AS1	0.453685	1.53703e-07	postive
PRKD3	LINC01140	0.34784	8.64488e-05	postive
PRKD3	LINC00588	0.31532	0.000403686	postive
PRKD3	KLF3-AS1	0.335176	0.000160784	postive
PRKD3	HEXA-AS1	0.301374	0.000742713	postive
PRKD3	HAND2-AS1	0.376795	1.88787e-05	postive
PRKD3	DLEU2	0.321948	0.000298968	postive
PRKD3	CPS1-IT1	0.35303	6.6518e-05	postive
PRKD3	BPESC1	0.304893	0.000638619	postive
PRKD3	ARMC2-AS1	0.342567	0.000112297	postive
PRKD1	WT1-AS	0.356444	5.58473e-05	postive
PRKD1	RFPL3S	0.4411	3.67216e-07	postive
PRKD1	RBFADN	0.32205	0.000297569	postive
PRKD1	PTGER4P2-CDK2AP2P2	0.372267	2.41841e-05	postive
PRKD1	PART1	0.312916	0.000449386	postive
PRKD1	NBR2	0.331843	0.000188478	postive
PRKD1	MYCNOS	0.350781	7.45602e-05	postive
PRKD1	MEG3	0.389614	9.17707e-06	postive
PRKD1	LINC01136	0.332692	0.000181037	postive
PRKD1	LINC00939	0.302334	0.000712873	postive
PRKD1	LINC00652	0.304508	0.000649294	postive
PRKD1	LINC00563	0.353809	6.39273e-05	postive
PRKD1	LINC00474	0.336545	0.000150548	postive
PRKD1	LINC00472	0.373778	2.2275e-05	postive
PRKD1	LINC00216	0.358938	4.90872e-05	postive
PRKD1	KIAA0087	0.306688	0.000590823	postive
PRKD1	IGF2-AS	0.339395	0.00013114	postive
PRKD1	HCG9	0.322894	0.000286252	postive
PRKD1	HAND2-AS1	0.369913	2.74669e-05	postive
PRKD1	GK-AS1	0.354906	6.04381e-05	postive
PRKD1	FAM224A	0.354876	6.0531e-05	postive
PRKD1	FAM182A	0.360774	4.46078e-05	postive
PRKD1	ENTPD1-AS1	0.36064	4.49232e-05	postive
PRKD1	EGOT	0.304501	0.000649513	postive
PRKD1	DBET	0.302696	0.000701915	postive
PRKD1	CT62	0.342167	0.000114524	postive
PRKD1	CPS1-IT1	0.336247	0.000152721	postive
PRKD1	BPESC1	0.318515	0.000349582	postive
PRKD1	AGAP11	0.316751	0.000378569	postive
PRKAG1	TP53TG1	0.319198	0.000338917	postive
PRKAG1	RNF185-AS1	0.432366	6.58593e-07	postive
PRKAG1	POLR2J4	0.308431	0.000547598	postive
PRKAG1	PDCD4-AS1	0.321529	0.000304753	postive
PRKAG1	MAPKAPK5-AS1	0.401451	4.58734e-06	postive
PRKAG1	LINC00652	0.329984	0.000205791	postive
PRKAG1	HAND2-AS1	0.334842	0.000163381	postive
PRKAG1	GUSBP11	0.439446	4.1068e-07	postive
PRKAG1	GS1-600G8.3	0.330603	0.000199868	postive
PRKAG1	DTX2P1-UPK3BP1-PMS2P11	0.324705	0.000263315	postive
PRKAG1	DKFZP434A062	0.381244	1.47484e-05	postive
PRKAG1	C22orf24	0.306544	0.000594536	postive
PRKAG1	ATXN8OS	0.398338	5.51945e-06	postive
PRKAA2	WT1-AS	0.543622	9.77164e-11	postive
PRKAA2	SMG7-AS1	0.417009	1.76937e-06	postive
PRKAA2	RNF185-AS1	0.318207	0.000354488	postive
PRKAA2	RFPL3S	0.355308	5.92059e-05	postive
PRKAA2	RBFADN	0.367564	3.11575e-05	postive
PRKAA2	PTGER4P2-CDK2AP2P2	0.423513	1.17119e-06	postive
PRKAA2	PLAC4	0.399957	5.01426e-06	postive
PRKAA2	PART1	0.406404	3.40484e-06	postive
PRKAA2	NDUFB2-AS1	0.445604	2.69974e-07	postive
PRKAA2	NBR2	0.316696	0.000379508	postive
PRKAA2	N4BP2L2-IT2	0.377711	1.79487e-05	postive
PRKAA2	MYCNOS	0.395674	6.45611e-06	postive
PRKAA2	MEG3	0.430775	7.31245e-07	postive
PRKAA2	MCM3AP-AS1	0.317914	0.000359223	postive
PRKAA2	MCF2L-AS1	0.398673	5.4111e-06	postive
PRKAA2	LINC01136	0.419004	1.56044e-06	postive
PRKAA2	LINC00939	0.431699	6.88168e-07	postive
PRKAA2	LINC00894	0.307223	0.000577228	postive
PRKAA2	LINC00652	0.435599	5.31559e-07	postive
PRKAA2	LINC00574	0.431638	6.90969e-07	postive
PRKAA2	LINC00563	0.423633	1.16221e-06	postive
PRKAA2	LINC00474	0.363027	3.96361e-05	postive
PRKAA2	LINC00472	0.338616	0.000136198	postive
PRKAA2	LINC00216	0.42547	1.03271e-06	postive
PRKAA2	KIAA0087	0.378355	1.73199e-05	postive
PRKAA2	IGF2-AS	0.444902	2.83308e-07	postive
PRKAA2	HCG9	0.436693	4.94123e-07	postive
PRKAA2	HAND2-AS1	0.351473	7.19938e-05	postive
PRKAA2	GUSBP11	0.348852	8.21717e-05	postive
PRKAA2	GS1-600G8.3	0.33364	0.000173038	postive
PRKAA2	GK-AS1	0.37232	2.41152e-05	postive
PRKAA2	FOXN3-AS2	0.346281	9.34455e-05	postive
PRKAA2	FAM66D	0.341449	0.000118632	postive
PRKAA2	FAM215A	0.303073	0.000690653	postive
PRKAA2	ERC2-IT1	0.343801	0.000105671	postive
PRKAA2	ENTPD1-AS1	0.322025	0.000297905	postive
PRKAA2	EGOT	0.315394	0.000402349	postive
PRKAA2	DSCR4	0.416657	1.80898e-06	postive
PRKAA2	DLEU2L	0.36419	3.72768e-05	postive
PRKAA2	DKFZP434A062	0.391719	8.1281e-06	postive
PRKAA2	DIAPH2-AS1	0.40387	3.96812e-06	postive
PRKAA2	DGCR5	0.370366	2.68054e-05	postive
PRKAA2	CTC-338M12.4	0.349971	7.76726e-05	postive
PRKAA2	CT62	0.389826	9.06584e-06	postive
PRKAA2	CADM3-AS1	0.394496	6.91684e-06	postive
PRKAA2	C7orf69	0.367571	3.11449e-05	postive
PRKAA2	C5orf66	0.32374	0.000275314	postive
PRKAA2	C22orf24	0.37995	1.58527e-05	postive
PRKAA2	ATXN8OS	0.335348	0.000159461	postive
PRKAA2	AGAP11	0.346865	9.07629e-05	postive
PRKAA2	ADD3-AS1	0.449123	2.11628e-07	postive
PRKAA2	ACVR2B-AS1	0.362405	4.09552e-05	postive
PRKAA2	AC007389.3	0.365224	3.52908e-05	postive
PRKAA1	WT1-AS	0.317972	0.000358278	postive
PRKAA1	THAP9-AS1	0.429173	8.12128e-07	postive
PRKAA1	RFPL3S	0.43671	4.93532e-07	postive
PRKAA1	PTGER4P2-CDK2AP2P2	0.301198	0.000748334	postive
PRKAA1	PLAC4	0.31385	0.000431086	postive
PRKAA1	NDUFB2-AS1	0.306808	0.00058775	postive
PRKAA1	NBR2	0.372443	2.39543e-05	postive
PRKAA1	N4BP2L2-IT2	0.423941	1.13948e-06	postive
PRKAA1	MYCNOS	0.326726	0.000239727	postive
PRKAA1	MCF2L-AS1	0.379939	1.58617e-05	postive
PRKAA1	LINC01136	0.331519	0.000191402	postive
PRKAA1	LINC00939	0.347624	8.73885e-05	postive
PRKAA1	LINC00894	0.3127	0.000453719	postive
PRKAA1	LINC00667	0.313389	0.000440039	postive
PRKAA1	LINC00472	0.406028	3.48345e-06	postive
PRKAA1	LINC00342	0.340433	0.000124671	postive
PRKAA1	LINC00216	0.317069	0.000373184	postive
PRKAA1	LINC00115	0.335518	0.000158164	postive
PRKAA1	KLF3-AS1	0.439696	4.03809e-07	postive
PRKAA1	KIAA0087	0.417903	1.67271e-06	postive
PRKAA1	KCNQ1OT1	0.374272	2.16822e-05	postive
PRKAA1	HLA-F-AS1	0.312102	0.000465898	postive
PRKAA1	HEXA-AS1	0.490914	9.42925e-09	postive
PRKAA1	HCG9	0.311522	0.000478022	postive
PRKAA1	HCG18	0.401486	4.57775e-06	postive
PRKAA1	HAND2-AS1	0.401026	4.70531e-06	postive
PRKAA1	GS1-600G8.3	0.353232	6.58389e-05	postive
PRKAA1	FAM66D	0.329775	0.000207827	postive
PRKAA1	FAM224A	0.477028	2.777e-08	postive
PRKAA1	FAM182A	0.354985	6.01951e-05	postive
PRKAA1	ERC2-IT1	0.433514	6.1051e-07	postive
PRKAA1	ENTPD1-AS1	0.410194	2.70163e-06	postive
PRKAA1	EGOT	0.335676	0.000156975	postive
PRKAA1	DLEU2L	0.381753	1.43344e-05	postive
PRKAA1	DLEU2	0.447153	2.42612e-07	postive
PRKAA1	DLEU1	0.308132	0.000554797	postive
PRKAA1	DIAPH2-AS1	0.324349	0.000267689	postive
PRKAA1	DBET	0.327013	0.000236543	postive
PRKAA1	CT62	0.351679	7.12443e-05	postive
PRKAA1	CPS1-IT1	0.488822	1.11303e-08	postive
PRKAA1	CADM3-AS1	0.304762	0.000642241	postive
PRKAA1	C22orf24	0.425774	1.01263e-06	postive
PRKAA1	BPESC1	0.490809	9.5088e-09	postive
PRKAA1	ATXN8OS	0.349461	7.96917e-05	postive
PRKAA1	AGAP11	0.367733	3.08771e-05	postive
PRKAA1	ADD3-AS1	0.394095	7.08058e-06	postive
PRKAA1	AC004490.1	0.39674	6.06477e-06	postive
PPP1CC	RNF185-AS1	0.305343	0.000626311	postive
PPP1CC	RHPN1-AS1	0.303584	0.000675655	postive
PPP1CC	MCM3AP-AS1	0.373541	2.25652e-05	postive
PPP1CC	MAPKAPK5-AS1	0.302945	0.000694473	postive
PPP1CC	LINC00588	0.393571	7.30012e-06	postive
PPP1CC	HEXA-AS1	0.355301	5.92282e-05	postive
PPP1CC	HAND2-AS1	0.448022	2.2844e-07	postive
PPP1CC	GK-AS1	0.340865	0.000122071	postive
PPP1CC	FLJ13224	0.320002	0.000326753	postive
PPP1CC	ENTPD1-AS1	0.312851	0.000450685	postive
PPP1CC	DTX2P1-UPK3BP1-PMS2P11	0.348505	8.36135e-05	postive
PPP1CC	DLEU2	0.313618	0.000435563	postive
PPP1CC	CPS1-IT1	0.362148	4.15122e-05	postive
PPP1CC	C22orf24	0.350115	7.71077e-05	postive
PPP1CC	ATXN8OS	0.381291	1.47091e-05	postive
PPP1CC	AGAP11	0.312458	0.000458614	postive
PPP1CC	AC004490.1	0.32982	0.000207387	postive
PPP1CA	CYB561D2	0.319477	0.000334652	postive
PON3	TCL6	0.306979	0.000583395	postive
PON3	RFPL1S	0.324337	0.00026783	postive
PON3	PRR34	0.322977	0.000285167	postive
PON3	N4BP2L2-IT2	0.346301	9.33504e-05	postive
PON3	MAGEA10-MAGEA5	0.399832	5.05181e-06	postive
PON3	LINC00563	0.338259	0.000138579	postive
PON3	LINC00474	0.344372	0.000102731	postive
PON3	LINC00216	0.312498	0.000457796	postive
PON3	HCG9	0.361684	4.25329e-05	postive
PON3	EGOT	0.333362	0.000175351	postive
PON3	DGCR11	0.312819	0.000451331	postive
PON2	LINC00667	0.309684	0.000518342	postive
PON2	DGCR11	0.401636	4.53693e-06	postive
PNPLA6	RNF185-AS1	0.319301	0.000337339	postive
PNPLA6	GUSBP11	0.324149	0.000270174	postive
PNPLA6	FAM224A	0.345132	9.89348e-05	postive
PNPLA6	CYB561D2	0.321742	0.000301797	postive
PNPLA3	WT1-AS	0.339058	0.000133305	postive
PNPLA3	TCL6	0.304114	0.00066044	postive
PNPLA3	SMG7-AS1	0.425264	1.04654e-06	postive
PNPLA3	RBFADN	0.445448	2.72877e-07	postive
PNPLA3	PTGER4P2-CDK2AP2P2	0.343753	0.000105922	postive
PNPLA3	PRR34	0.467339	5.73802e-08	postive
PNPLA3	PRORY	0.34169	0.000117236	postive
PNPLA3	PART1	0.379116	1.66044e-05	postive
PNPLA3	MYCNOS	0.331518	0.000191409	postive
PNPLA3	LINC01361	0.339881	0.000128077	postive
PNPLA3	LINC01136	0.344971	9.97295e-05	postive
PNPLA3	LINC00963	0.366709	3.26113e-05	postive
PNPLA3	LINC00939	0.33729	0.00014523	postive
PNPLA3	LINC00894	0.3237	0.000275826	postive
PNPLA3	LINC00574	0.383296	1.31449e-05	postive
PNPLA3	KIAA0087	0.378278	1.73948e-05	postive
PNPLA3	INE1	0.370727	2.62882e-05	postive
PNPLA3	GUSBP11	0.378537	1.7147e-05	postive
PNPLA3	GSN-AS1	0.345887	9.52944e-05	postive
PNPLA3	FOXN3-AS2	0.440324	3.87043e-07	postive
PNPLA3	FAM66D	0.373537	2.25695e-05	postive
PNPLA3	FAM215A	0.312204	0.000463802	postive
PNPLA3	FAM106A	0.318349	0.000352223	postive
PNPLA3	ERC2-IT1	0.345701	9.61795e-05	postive
PNPLA3	DTX2P1-UPK3BP1-PMS2P11	0.339706	0.00012917	postive
PNPLA3	DLEU2L	0.324495	0.000265882	postive
PNPLA3	DKFZP434A062	0.360936	4.42326e-05	postive
PNPLA3	DIAPH2-AS1	0.350097	7.71804e-05	postive
PNPLA3	DGCR5	0.428657	8.39924e-07	postive
PNPLA3	DBET	0.301035	0.000753524	postive
PNPLA3	CT62	0.304507	0.000649348	postive
PNPLA3	CADM3-AS1	0.436846	4.89067e-07	postive
PNPLA3	C5orf66	0.421407	1.33992e-06	postive
PNPLA3	BPESC1	0.315858	0.000394066	postive
PNPLA3	ANKRD10-IT1	0.303198	0.000686959	postive
PNPLA3	AGAP11	0.314714	0.000414774	postive
PNPLA3	ADD3-AS1	0.349919	7.78771e-05	postive
PNPLA3	AC007389.3	0.322859	0.000286711	postive
PNPLA3	AC007292.3	0.357506	5.28684e-05	postive
PNPLA3	AC005838.2	0.351434	7.21349e-05	postive
PLIN3	SMAD5-AS1	0.366517	3.29481e-05	postive
PLIN3	RNF185-AS1	0.316633	0.000380581	postive
PLIN3	KIF25-AS1	-0.320326	0.00032197	negative
PLIN3	HEXA-AS1	0.336822	0.000148547	postive
PLIN3	FAM66D	0.304245	0.000656725	postive
PLIN3	FAM224A	0.429858	7.76568e-07	postive
PLIN3	EGOT	0.331073	0.000195477	postive
PLIN3	CPS1-IT1	0.363287	3.90978e-05	postive
PLIN3	BPESC1	0.318551	0.000349006	postive
PLIN3	ATXN8OS	0.31271	0.00045351	postive
PLIN3	AC004490.1	0.35484	6.06454e-05	postive
PLIN2	CADM3-AS1	0.333013	0.000178294	postive
PLIN2	BPESC1	0.301777	0.000730049	postive
PLEKHA5	LINC01140	0.368915	2.89826e-05	postive
PLEKHA5	KCNQ1OT1	0.388099	1.00096e-05	postive
PLEKHA5	HEXA-AS1	0.374864	2.0992e-05	postive
PLEKHA5	FLJ13224	0.327368	0.000232663	postive
PLEKHA5	FAM66D	0.370238	2.69906e-05	postive
PLEKHA5	FAM224A	0.44371	3.07418e-07	postive
PLEKHA5	FAM182A	0.339345	0.000131461	postive
PLEKHA5	ENTPD1-AS1	0.324198	0.000269566	postive
PLEKHA5	DBET	0.338588	0.000136387	postive
PLEKHA5	CPS1-IT1	0.39985	5.0465e-06	postive
PLEKHA5	BPESC1	0.491659	8.88652e-09	postive
PLEKHA5	ATXN8OS	0.308732	0.000540427	postive
PLEKHA5	AC004490.1	0.310939	0.000490472	postive
PLD1	WT1-AS	0.460462	9.47598e-08	postive
PLD1	TCL6	0.387733	1.02211e-05	postive
PLD1	RNF185-AS1	0.43081	7.2959e-07	postive
PLD1	RBFADN	0.440194	3.9045e-07	postive
PLD1	PTGER4P2-CDK2AP2P2	0.348874	8.20804e-05	postive
PLD1	PRR34	0.352977	6.67001e-05	postive
PLD1	PLAC4	0.467487	5.67593e-08	postive
PLD1	PART1	0.411483	2.49549e-06	postive
PLD1	N4BP2L2-IT2	0.380727	1.51803e-05	postive
PLD1	MYCNOS	0.381904	1.42136e-05	postive
PLD1	LINC01278	0.349547	7.93488e-05	postive
PLD1	LINC01136	0.411221	2.53615e-06	postive
PLD1	LINC00939	0.46236	8.25965e-08	postive
PLD1	LINC00894	0.380202	1.56315e-05	postive
PLD1	LINC00652	0.415865	1.90094e-06	postive
PLD1	LINC00574	0.376869	1.88023e-05	postive
PLD1	LINC00563	0.412464	2.3488e-06	postive
PLD1	LINC00474	0.41723	1.745e-06	postive
PLD1	LINC00216	0.377511	1.8148e-05	postive
PLD1	KIAA0087	0.326922	0.000237556	postive
PLD1	KCNQ1DN	0.356034	5.70375e-05	postive
PLD1	HEXA-AS1	0.450543	1.91676e-07	postive
PLD1	HCG9	0.412686	2.31673e-06	postive
PLD1	HAND2-AS1	0.318591	0.000348372	postive
PLD1	GUSBP11	0.358941	4.90802e-05	postive
PLD1	GSN-AS1	0.33722	0.000145722	postive
PLD1	GS1-600G8.3	0.492639	8.21754e-09	postive
PLD1	GK-AS1	0.460744	9.28505e-08	postive
PLD1	FOXN3-AS2	0.357997	5.15433e-05	postive
PLD1	FLJ13224	0.366763	3.2519e-05	postive
PLD1	FAM66D	0.346133	9.41352e-05	postive
PLD1	FAM224A	0.363347	3.89742e-05	postive
PLD1	FAM182A	0.457787	1.14837e-07	postive
PLD1	ERC2-IT1	0.458346	1.10336e-07	postive
PLD1	ENTPD1-AS1	0.398773	5.37922e-06	postive
PLD1	EGOT	0.358922	4.91288e-05	postive
PLD1	DLEU2L	0.381165	1.48138e-05	postive
PLD1	DKFZP434A062	0.385141	1.1844e-05	postive
PLD1	DIAPH2-AS1	0.426807	9.47162e-07	postive
PLD1	DBET	0.370056	2.72562e-05	postive
PLD1	CT62	0.433254	6.21102e-07	postive
PLD1	CPS1-IT1	0.338202	0.000138964	postive
PLD1	CADM3-AS1	0.511624	1.71736e-09	postive
PLD1	C5orf66	0.432133	6.68792e-07	postive
PLD1	BPESC1	0.374888	2.0964e-05	postive
PLD1	ATXN8OS	0.485118	1.48881e-08	postive
PLD1	AGAP11	0.394728	6.82374e-06	postive
PLD1	ADD3-AS1	0.323849	0.000273935	postive
PLD1	ACVR2B-AS1	0.371644	2.50153e-05	postive
PLD1	AC007389.3	0.433883	5.9574e-07	postive
PLA2G7	HCP5	0.45794	1.13589e-07	postive
PLA2G5	IDI2-AS1	0.302481	0.000708411	postive
PIP4K2B	WT1-AS	0.506008	2.75633e-09	postive
PIP4K2B	TCL6	0.308124	0.000554988	postive
PIP4K2B	SMG7-AS1	0.343519	0.000107152	postive
PIP4K2B	RNF185-AS1	0.451539	1.78757e-07	postive
PIP4K2B	RHPN1-AS1	0.327989	0.000226006	postive
PIP4K2B	RBFADN	0.511531	1.73096e-09	postive
PIP4K2B	PTGER4P2-CDK2AP2P2	0.469278	4.97108e-08	postive
PIP4K2B	PRR34	0.369973	2.73787e-05	postive
PIP4K2B	PLAC4	0.526028	4.9031e-10	postive
PIP4K2B	PART1	0.417148	1.75406e-06	postive
PIP4K2B	NOP14-AS1	0.352271	6.91386e-05	postive
PIP4K2B	NBR2	0.318567	0.000348758	postive
PIP4K2B	N4BP2L2-IT2	0.402247	4.37417e-06	postive
PIP4K2B	MCM3AP-AS1	0.335794	0.000156082	postive
PIP4K2B	MCF2L-AS1	0.358723	4.96391e-05	postive
PIP4K2B	LINC01136	0.367499	3.12654e-05	postive
PIP4K2B	LINC00939	0.340096	0.00012674	postive
PIP4K2B	LINC00921	0.338459	0.000137243	postive
PIP4K2B	LINC00894	0.477765	2.62553e-08	postive
PIP4K2B	LINC00652	0.467557	5.64642e-08	postive
PIP4K2B	LINC00588	0.320011	0.000326619	postive
PIP4K2B	LINC00563	0.366952	3.21915e-05	postive
PIP4K2B	LINC00474	0.374042	2.19569e-05	postive
PIP4K2B	LINC00472	0.356694	5.51306e-05	postive
PIP4K2B	LINC00216	0.511155	1.7871e-09	postive
PIP4K2B	KCNQ1DN	0.31305	0.000446708	postive
PIP4K2B	IGF2-AS	0.512619	1.57785e-09	postive
PIP4K2B	HLA-F-AS1	0.439869	3.99127e-07	postive
PIP4K2B	HCG9	0.326631	0.000240791	postive
PIP4K2B	GUSBP11	0.458338	1.10396e-07	postive
PIP4K2B	GSN-AS1	0.307446	0.000571661	postive
PIP4K2B	GS1-600G8.3	0.342596	0.000112135	postive
PIP4K2B	GK-AS1	0.400744	4.78514e-06	postive
PIP4K2B	FLJ13224	0.332457	0.000183065	postive
PIP4K2B	FAM224A	0.329695	0.000208613	postive
PIP4K2B	FAM182A	0.420957	1.37881e-06	postive
PIP4K2B	FAM106A	0.328036	0.000225503	postive
PIP4K2B	ERC2-IT1	0.416821	1.79047e-06	postive
PIP4K2B	ENTPD1-AS1	0.32895	0.000216043	postive
PIP4K2B	EGOT	0.311192	0.000485036	postive
PIP4K2B	DTX2P1-UPK3BP1-PMS2P11	0.512191	1.63645e-09	postive
PIP4K2B	DLEU1	0.308786	0.000539147	postive
PIP4K2B	DKFZP434A062	0.428449	8.51351e-07	postive
PIP4K2B	DGCR5	0.317484	0.000366264	postive
PIP4K2B	DBET	0.42035	1.43299e-06	postive
PIP4K2B	CT62	0.422214	1.27267e-06	postive
PIP4K2B	CADM3-AS1	0.380735	1.51734e-05	postive
PIP4K2B	C5orf66	0.422128	1.27967e-06	postive
PIP4K2B	ATXN8OS	0.449382	2.07837e-07	postive
PIP4K2B	AGAP11	0.481592	1.95742e-08	postive
PIP4K2B	ACVR2B-AS1	0.39193	8.0295e-06	postive
PIP4K2B	AC007389.3	0.335515	0.000158188	postive
PIKFYVE	THAP9-AS1	0.329277	0.000212753	postive
PIKFYVE	MCM3AP-AS1	0.363997	3.76587e-05	postive
PIKFYVE	MCF2L-AS1	0.31689	0.000376208	postive
PIKFYVE	LINC00588	0.319563	0.00033335	postive
PIKFYVE	LINC00472	0.385266	1.17606e-05	postive
PIKFYVE	LINC00342	0.329438	0.000211155	postive
PIKFYVE	KLF3-AS1	0.342841	0.000110795	postive
PIKFYVE	KCNQ1OT1	0.304855	0.000639649	postive
PIKFYVE	HEXA-AS1	0.484544	1.55692e-08	postive
PIKFYVE	HAND2-AS1	0.407189	3.24625e-06	postive
PIKFYVE	FAM182A	0.324146	0.000270203	postive
PIKFYVE	ENTPD1-AS1	0.330763	0.000198369	postive
PIKFYVE	DLEU2L	0.306148	0.000604857	postive
PIKFYVE	DLEU2	0.410735	2.61326e-06	postive
PIKFYVE	CTC-338M12.4	0.371597	2.50796e-05	postive
PIKFYVE	CPS1-IT1	0.348418	8.39783e-05	postive
PIKFYVE	C22orf24	0.369209	2.85273e-05	postive
PIKFYVE	BPESC1	0.381062	1.48986e-05	postive
PIKFYVE	AC004490.1	0.401272	4.63678e-06	postive
PIK3CG	WT1-AS	0.341383	0.000119013	postive
PIK3CG	TCL6	0.334815	0.000163593	postive
PIK3CG	RNF185-AS1	0.400717	4.79281e-06	postive
PIK3CG	RGS5	0.31938	0.000336132	postive
PIK3CG	RBFADN	0.36346	3.87422e-05	postive
PIK3CG	PTGER4P2-CDK2AP2P2	0.369502	2.80822e-05	postive
PIK3CG	PRR34	0.412693	2.31583e-06	postive
PIK3CG	PRORY	0.325608	0.000252522	postive
PIK3CG	PLAC4	0.337679	0.000142523	postive
PIK3CG	N4BP2L2-IT2	0.427203	9.23203e-07	postive
PIK3CG	MYCNOS	0.30424	0.000656851	postive
PIK3CG	LINC01136	0.30588	0.000611908	postive
PIK3CG	LINC00939	0.318769	0.000345584	postive
PIK3CG	LINC00894	0.336539	0.000150589	postive
PIK3CG	LINC00574	0.361936	4.19759e-05	postive
PIK3CG	LINC00563	0.325908	0.000249035	postive
PIK3CG	LINC00474	0.313041	0.000446893	postive
PIK3CG	LINC00216	0.384747	1.21115e-05	postive
PIK3CG	KIAA0087	0.362602	4.0532e-05	postive
PIK3CG	HEXA-AS1	0.370386	2.67765e-05	postive
PIK3CG	HCG9	0.34772	8.69696e-05	postive
PIK3CG	GUSBP11	0.426273	9.80496e-07	postive
PIK3CG	GSN-AS1	0.335455	0.000158643	postive
PIK3CG	GS1-600G8.3	0.362383	4.10021e-05	postive
PIK3CG	GK-AS1	0.383601	1.29204e-05	postive
PIK3CG	FOXN3-AS2	0.316861	0.000376693	postive
PIK3CG	EGOT	0.400617	4.82121e-06	postive
PIK3CG	DTX2P1-UPK3BP1-PMS2P11	0.340163	0.000126324	postive
PIK3CG	DLEU2L	0.315271	0.000404574	postive
PIK3CG	DKFZP434A062	0.386491	1.09706e-05	postive
PIK3CG	DIAPH2-AS1	0.391946	8.02207e-06	postive
PIK3CG	DBET	0.343519	0.00010715	postive
PIK3CG	CT62	0.339555	0.000130126	postive
PIK3CG	CADM3-AS1	0.43669	4.94216e-07	postive
PIK3CG	C5orf66	0.313115	0.000445426	postive
PIK3CG	ATXN8OS	0.356711	5.50842e-05	postive
PIK3CG	AGAP11	0.393634	7.27304e-06	postive
PIK3CG	AC007389.3	0.360772	4.46137e-05	postive
PIK3C2B	WT1-AS	0.404007	3.93566e-06	postive
PIK3C2B	SMG7-AS1	0.316231	0.000387515	postive
PIK3C2B	RGS5	0.519673	8.58618e-10	postive
PIK3C2B	RBFADN	0.422104	1.28165e-06	postive
PIK3C2B	PTGER4P2-CDK2AP2P2	0.34236	0.000113442	postive
PIK3C2B	PLAC4	0.445903	2.64474e-07	postive
PIK3C2B	PDCD4-AS1	0.307505	0.000570187	postive
PIK3C2B	PART1	0.314998	0.000409547	postive
PIK3C2B	N4BP2L2-IT2	0.394659	6.8512e-06	postive
PIK3C2B	MEG3	0.358958	4.90357e-05	postive
PIK3C2B	MCM3AP-AS1	0.338482	0.000137088	postive
PIK3C2B	MCF2L-AS1	0.332433	0.000183274	postive
PIK3C2B	LINC01278	0.359696	4.71887e-05	postive
PIK3C2B	LINC01136	0.346869	9.07453e-05	postive
PIK3C2B	LINC00921	0.357364	5.32564e-05	postive
PIK3C2B	LINC00894	0.525877	4.9696e-10	postive
PIK3C2B	LINC00652	0.38105	1.49093e-05	postive
PIK3C2B	LINC00474	0.318627	0.000347809	postive
PIK3C2B	LINC00472	0.328769	0.000217886	postive
PIK3C2B	LINC00216	0.3849	1.20072e-05	postive
PIK3C2B	INE1	0.366347	3.32479e-05	postive
PIK3C2B	IGF2-AS	0.361028	4.40215e-05	postive
PIK3C2B	HLA-F-AS1	0.380852	1.50745e-05	postive
PIK3C2B	HCG9	0.328858	0.000216983	postive
PIK3C2B	GSN-AS1	0.306674	0.000591199	postive
PIK3C2B	GK-AS1	0.341343	0.00011925	postive
PIK3C2B	FAM224A	0.334792	0.00016377	postive
PIK3C2B	FAM182B	0.348969	8.1687e-05	postive
PIK3C2B	FAM106A	0.380657	1.52394e-05	postive
PIK3C2B	ERC2-IT1	0.395293	6.60189e-06	postive
PIK3C2B	ENTPD1-AS1	0.454232	1.47879e-07	postive
PIK3C2B	EGOT	0.309967	0.000511929	postive
PIK3C2B	DTX2P1-UPK3BP1-PMS2P11	0.372635	2.3706e-05	postive
PIK3C2B	CADM3-AS1	0.36646	3.30476e-05	postive
PIK3C2B	C5orf66	0.410824	2.59889e-06	postive
PIK3C2B	ATXN8OS	0.304991	0.00063592	postive
PIK3C2B	AGAP11	0.33065	0.000199427	postive
PIK3C2B	ADD3-AS1	0.303746	0.00067096	postive
PIK3C2B	ACVR2B-AS1	0.489897	1.02228e-08	postive
PI4K2A	HCP5	0.340655	0.000123329	postive
PI4K2A	CYB561D2	0.339823	0.000128438	postive
PHYH	LINC01140	0.351951	7.02713e-05	postive
PHYH	LINC00342	0.340037	0.000127102	postive
PHYH	KLF3-AS1	0.302763	0.000699904	postive
PHYH	HAND2-AS1	0.325016	0.000259549	postive
PHYH	GUSBP11	0.305245	0.000628973	postive
PHYH	FAM224A	0.414422	2.08006e-06	postive
PHYH	FAM182A	0.315071	0.000408209	postive
PHYH	DBET	0.339037	0.000133442	postive
PHYH	CPS1-IT1	0.399843	5.04854e-06	postive
PHYH	AC004490.1	0.3134	0.000439816	postive
PDHB	MAPKAPK5-AS1	0.328144	0.000224365	postive
PDHB	HEXA-AS1	0.307348	0.000574092	postive
PDHB	HAND2-AS1	0.364203	3.72522e-05	postive
PDHB	DGCR11	0.301357	0.000743252	postive
PDHB	CYB561D2	0.444123	2.98848e-07	postive
PCYT1A	WT1-AS	0.496453	6.04604e-09	postive
PCYT1A	TCL6	0.415537	1.94025e-06	postive
PCYT1A	SMG7-AS1	0.399579	5.12807e-06	postive
PCYT1A	RNF185-AS1	0.479877	2.23368e-08	postive
PCYT1A	RFPL3S	0.300199	0.000780803	postive
PCYT1A	RBFADN	0.427189	9.24007e-07	postive
PCYT1A	PTGER4P2-CDK2AP2P2	0.445955	2.63516e-07	postive
PCYT1A	PRR34	0.449892	2.00582e-07	postive
PCYT1A	PLAC4	0.508625	2.21338e-09	postive
PCYT1A	PART1	0.376058	1.96606e-05	postive
PCYT1A	NDUFB2-AS1	0.378369	1.73072e-05	postive
PCYT1A	N4BP2L2-IT2	0.417967	1.66603e-06	postive
PCYT1A	MYCNOS	0.428224	8.63909e-07	postive
PCYT1A	LINC01278	0.370735	2.62761e-05	postive
PCYT1A	LINC01136	0.49636	6.09192e-09	postive
PCYT1A	LINC00939	0.416666	1.80791e-06	postive
PCYT1A	LINC00894	0.436655	4.95375e-07	postive
PCYT1A	LINC00652	0.377656	1.80036e-05	postive
PCYT1A	LINC00574	0.395946	6.35421e-06	postive
PCYT1A	LINC00563	0.45215	1.71259e-07	postive
PCYT1A	LINC00474	0.429846	7.77137e-07	postive
PCYT1A	LINC00216	0.41984	1.48009e-06	postive
PCYT1A	KIAA0087	0.436762	4.91851e-07	postive
PCYT1A	HEXA-AS1	0.504886	3.02652e-09	postive
PCYT1A	HCG9	0.516549	1.1261e-09	postive
PCYT1A	HAND2-AS1	0.346128	9.41569e-05	postive
PCYT1A	GUSBP11	0.47244	3.92696e-08	postive
PCYT1A	GSN-AS1	0.353325	6.55249e-05	postive
PCYT1A	GS1-600G8.3	0.562812	1.50728e-11	postive
PCYT1A	GK-AS1	0.493678	7.56146e-09	postive
PCYT1A	FOXN3-AS2	0.390764	8.5893e-06	postive
PCYT1A	FLJ13224	0.467847	5.52706e-08	postive
PCYT1A	FAM224A	0.311035	0.0004884	postive
PCYT1A	FAM182A	0.461126	9.03214e-08	postive
PCYT1A	ERC2-IT1	0.435184	5.46449e-07	postive
PCYT1A	ENTPD1-AS1	0.311341	0.00048185	postive
PCYT1A	EGOT	0.39768	5.73794e-06	postive
PCYT1A	DTX2P1-UPK3BP1-PMS2P11	0.420227	1.4442e-06	postive
PCYT1A	DLEU2L	0.382858	1.34725e-05	postive
PCYT1A	DLEU1	0.326248	0.000245129	postive
PCYT1A	DKFZP434A062	0.448098	2.27248e-07	postive
PCYT1A	DIAPH2-AS1	0.489692	1.03895e-08	postive
PCYT1A	DBET	0.407394	3.20615e-06	postive
PCYT1A	CT62	0.527276	4.38636e-10	postive
PCYT1A	CPS1-IT1	0.356704	5.5102e-05	postive
PCYT1A	CADM3-AS1	0.518245	9.72283e-10	postive
PCYT1A	C7orf69	0.333523	0.000174009	postive
PCYT1A	C5orf66	0.38544	1.16452e-05	postive
PCYT1A	BPESC1	0.305307	0.000627279	postive
PCYT1A	ATXN8OS	0.515166	1.26859e-09	postive
PCYT1A	AGAP11	0.503911	3.28169e-09	postive
PCYT1A	ADD3-AS1	0.365107	3.55108e-05	postive
PCYT1A	AC007389.3	0.438251	4.45108e-07	postive
PCBD1	SNHG17	0.403077	4.16198e-06	postive
PCBD1	MAPKAPK5-AS1	0.30926	0.000528075	postive
PCBD1	LINC01140	-0.339114	0.000132944	negative
PCBD1	LINC00963	-0.445705	2.68097e-07	negative
PAFAH1B1	THAP9-AS1	0.46103	9.09527e-08	postive
PAFAH1B1	RFPL1S	0.329349	0.000212039	postive
PAFAH1B1	NBR2	0.39458	6.88313e-06	postive
PAFAH1B1	MEG3	0.33767	0.000142587	postive
PAFAH1B1	MCM3AP-AS1	0.336957	0.000147581	postive
PAFAH1B1	LINC00588	0.396249	6.24225e-06	postive
PAFAH1B1	LINC00472	0.39932	5.20758e-06	postive
PAFAH1B1	LINC00342	0.441062	3.68178e-07	postive
PAFAH1B1	KLF3-AS1	0.438302	4.43595e-07	postive
PAFAH1B1	HEXA-AS1	0.399758	5.07399e-06	postive
PAFAH1B1	HCG18	0.404708	3.77288e-06	postive
PAFAH1B1	HAND2-AS1	0.329122	0.000214306	postive
PAFAH1B1	FAM66D	0.333099	0.000177562	postive
PAFAH1B1	FAM224A	0.406088	3.47073e-06	postive
PAFAH1B1	FAM215A	0.353252	6.5772e-05	postive
PAFAH1B1	ERC2-IT1	0.315248	0.000404989	postive
PAFAH1B1	ENTPD1-AS1	0.348611	8.31696e-05	postive
PAFAH1B1	DLEU2L	0.373884	2.21463e-05	postive
PAFAH1B1	DLEU2	0.338645	0.000136011	postive
PAFAH1B1	CPS1-IT1	0.490454	9.78078e-09	postive
PAFAH1B1	C22orf24	0.447872	2.3083e-07	postive
PAFAH1B1	BPESC1	0.491045	9.33141e-09	postive
PAFAH1B1	AC004490.1	0.436093	5.14311e-07	postive
OSBPL3	RNF185-AS1	0.424149	1.12439e-06	postive
OSBPL3	LINC00342	0.306866	0.000586271	postive
OSBPL3	HEXA-AS1	0.391279	8.33736e-06	postive
OSBPL3	HAND2-AS1	0.345072	9.92321e-05	postive
OSBPL3	GSN-AS1	0.333593	0.000173433	postive
OSBPL3	GS1-600G8.3	0.329098	0.00021455	postive
OSBPL3	FAM182A	0.309121	0.000531293	postive
OSBPL3	DLEU2L	0.352854	6.71163e-05	postive
OSBPL3	DLEU1	0.314328	0.000421991	postive
OSBPL3	DKFZP434A062	0.318061	0.000356835	postive
OSBPL3	DBET	0.326803	0.000238876	postive
OSBPL3	CT62	0.307107	0.000580154	postive
OSBPL3	CPS1-IT1	0.41787	1.67616e-06	postive
OSBPL3	C22orf24	0.325904	0.000249074	postive
OSBPL3	BPESC1	0.355722	5.79591e-05	postive
OSBPL3	ATXN8OS	0.354927	6.03748e-05	postive
ORMDL2	MAPKAPK5-AS1	0.40791	3.1069e-06	postive
ORMDL2	LINC00963	-0.395748	6.42841e-06	negative
ORMDL2	HLA-F-AS1	-0.326615	0.000240971	negative
ORMDL2	HCG18	-0.309716	0.000517615	negative
ORMDL2	CYB561D2	0.338601	0.0001363	postive
ODC1	THAP9-AS1	0.362133	4.15446e-05	postive
ODC1	SNHG17	0.443323	3.15667e-07	postive
ODC1	MCM3AP-AS1	0.347023	9.00484e-05	postive
ODC1	HAND2-AS1	0.312954	0.000448628	postive
NTHL1	TP53TG1	0.313774	0.000432558	postive
NTHL1	SNHG17	0.315133	0.000407087	postive
NR1H2	CYB561D2	0.395169	6.64989e-06	postive
NPC1	WT1-AS	0.331348	0.000192951	postive
NPC1	TCL6	0.505184	2.95225e-09	postive
NPC1	RNF185-AS1	0.490469	9.76926e-09	postive
NPC1	RFPL3S	0.35323	6.58447e-05	postive
NPC1	RBFADN	0.469438	4.91268e-08	postive
NPC1	PTGER4P2-CDK2AP2P2	0.500272	4.42983e-09	postive
NPC1	PRR34	0.437013	4.83637e-07	postive
NPC1	PRORY	0.378253	1.74184e-05	postive
NPC1	PLAC4	0.3981	5.59748e-06	postive
NPC1	PART1	0.444854	2.84245e-07	postive
NPC1	N4BP2L2-IT2	0.40797	3.09553e-06	postive
NPC1	MYCNOS	0.355615	5.82806e-05	postive
NPC1	MAGEA10-MAGEA5	0.33063	0.000199616	postive
NPC1	LINC01136	0.396164	6.27339e-06	postive
NPC1	LINC00939	0.345209	9.85587e-05	postive
NPC1	LINC00894	0.386993	1.0662e-05	postive
NPC1	LINC00574	0.3341	0.000169285	postive
NPC1	LINC00563	0.43902	4.22645e-07	postive
NPC1	LINC00474	0.384048	1.25989e-05	postive
NPC1	LINC00216	0.389309	9.33902e-06	postive
NPC1	KIAA0087	0.420782	1.39421e-06	postive
NPC1	HEXA-AS1	0.389599	9.18489e-06	postive
NPC1	HCG9	0.323724	0.000275519	postive
NPC1	HAND2-AS1	0.346507	9.23985e-05	postive
NPC1	GUSBP11	0.477952	2.58827e-08	postive
NPC1	GSN-AS1	0.31945	0.000335065	postive
NPC1	GS1-600G8.3	0.514474	1.34629e-09	postive
NPC1	GK-AS1	0.372132	2.43622e-05	postive
NPC1	FOXN3-AS2	0.329585	0.000209697	postive
NPC1	FLJ13224	0.419027	1.55822e-06	postive
NPC1	FAM224A	0.338453	0.00013728	postive
NPC1	FAM182A	0.477012	2.78047e-08	postive
NPC1	ERC2-IT1	0.43192	6.78237e-07	postive
NPC1	ENTPD1-AS1	0.304913	0.000638056	postive
NPC1	EGOT	0.427172	9.25045e-07	postive
NPC1	DTX2P1-UPK3BP1-PMS2P11	0.300352	0.000775751	postive
NPC1	DLEU2L	0.450856	1.87526e-07	postive
NPC1	DLEU1	0.32415	0.000270161	postive
NPC1	DKFZP434A062	0.474304	3.41335e-08	postive
NPC1	DIAPH2-AS1	0.490148	1.00212e-08	postive
NPC1	DGCR11	0.391775	8.10185e-06	postive
NPC1	DBET	0.485575	1.4366e-08	postive
NPC1	CT62	0.515671	1.21466e-09	postive
NPC1	CPS1-IT1	0.454955	1.40501e-07	postive
NPC1	CADM3-AS1	0.477147	2.75196e-08	postive
NPC1	C5orf66	0.434108	5.86939e-07	postive
NPC1	BPESC1	0.448451	2.21745e-07	postive
NPC1	ATXN8OS	0.446727	2.49856e-07	postive
NPC1	AGAP11	0.503099	3.51005e-09	postive
NPC1	AC007389.3	0.343175	0.000108986	postive
NPC1	AC004490.1	0.334479	0.000166245	postive
NFKBIA	ZNF213-AS1	-0.309024	0.000533557	negative
NFKB1	RNF185-AS1	0.46023	9.63628e-08	postive
NFKB1	PLAC4	0.324348	0.000267698	postive
NFKB1	MYCNOS	0.309669	0.000518674	postive
NFKB1	LINC01278	0.337233	0.000145634	postive
NFKB1	LINC00588	0.320405	0.000320814	postive
NFKB1	KIAA0087	0.311124	0.000486498	postive
NFKB1	HEXA-AS1	0.308018	0.00055758	postive
NFKB1	GUSBP11	0.307931	0.000559686	postive
NFKB1	GS1-600G8.3	0.342331	0.000113608	postive
NFKB1	FAM224A	0.308727	0.000540558	postive
NFKB1	EGOT	0.36614	3.36147e-05	postive
NFKB1	DTX2P1-UPK3BP1-PMS2P11	0.30439	0.000652624	postive
NFKB1	DLEU2L	0.355684	5.80735e-05	postive
NFKB1	CPS1-IT1	0.39971	5.08854e-06	postive
NFKB1	C5orf66	0.349079	8.12379e-05	postive
NFKB1	C22orf24	0.36645	3.30648e-05	postive
NFKB1	BPESC1	0.330387	0.000201921	postive
NFKB1	ATXN8OS	0.407694	3.14796e-06	postive
NFKB1	AGAP11	0.319097	0.000340473	postive
NFKB1	AC007389.3	0.300218	0.000780186	postive
NFKB1	AC004490.1	0.357728	5.22661e-05	postive
NDUFAB1	SNHG17	0.391021	8.46254e-06	postive
NDUFAB1	LINC00963	-0.321873	0.000299987	negative
NCOR1	AC005838.2	0.369672	2.78259e-05	postive
NCOA1	WT1-AS	0.351611	7.14913e-05	postive
NCOA1	TCL6	0.319031	0.000341501	postive
NCOA1	SMAD5-AS1	0.335668	0.000157034	postive
NCOA1	RNF185-AS1	0.438465	4.38751e-07	postive
NCOA1	RBFADN	0.348027	8.56411e-05	postive
NCOA1	PTGER4P2-CDK2AP2P2	0.340259	0.000125735	postive
NCOA1	PRR34	0.398717	5.39711e-06	postive
NCOA1	PLAC4	0.344215	0.000103532	postive
NCOA1	PART1	0.330979	0.000196348	postive
NCOA1	NOP14-AS1	0.33766	0.000142656	postive
NCOA1	MYCNOS	0.421212	1.35661e-06	postive
NCOA1	MEG3	0.344037	0.000104446	postive
NCOA1	MCF2L-AS1	0.395053	6.69529e-06	postive
NCOA1	LINC00667	0.357445	5.30342e-05	postive
NCOA1	LINC00652	0.305861	0.000612405	postive
NCOA1	LINC00588	0.643717	1.27406e-15	postive
NCOA1	LINC00472	0.484501	1.56213e-08	postive
NCOA1	KLF3-AS1	0.371528	2.51734e-05	postive
NCOA1	KIAA0087	0.305465	0.00062302	postive
NCOA1	IGF2-AS	0.308594	0.000543714	postive
NCOA1	HCG18	0.302481	0.000708403	postive
NCOA1	GUSBP11	0.396723	6.07052e-06	postive
NCOA1	FAM224A	0.312371	0.000460387	postive
NCOA1	FAM182A	0.304174	0.000658714	postive
NCOA1	ERC2-IT1	0.375467	2.03097e-05	postive
NCOA1	DTX2P1-UPK3BP1-PMS2P11	0.446181	2.59444e-07	postive
NCOA1	DKFZP434A062	0.352889	6.69977e-05	postive
NCOA1	DBET	0.31578	0.000395444	postive
NCOA1	CPS1-IT1	0.394634	6.86108e-06	postive
NCOA1	C5orf66	0.370586	2.64886e-05	postive
NCOA1	C22orf24	0.475774	3.05439e-08	postive
NCOA1	ATXN8OS	0.367567	3.11531e-05	postive
NCOA1	AGAP11	0.427447	9.08669e-07	postive
NCOA1	AC007389.3	0.323739	0.000275325	postive
NCOA1	AC004490.1	0.333319	0.000175708	postive
MYLIP	MCM3AP-AS1	0.41015	2.70898e-06	postive
MYLIP	LINC00588	0.448516	2.20736e-07	postive
MYLIP	LINC00472	0.421703	1.31486e-06	postive
MYLIP	LINC00342	0.398703	5.40152e-06	postive
MYLIP	KLF3-AS1	0.581126	2.25651e-12	postive
MYLIP	KCNQ1OT1	0.307404	0.000572694	postive
MYLIP	HCG18	0.331343	0.000193	postive
MYLIP	FAM224A	0.309224	0.000528911	postive
MYLIP	AC004490.1	0.315776	0.000395513	postive
MTMR10	WT1-AS	0.418587	1.60209e-06	postive
MTMR10	TCL6	0.363374	3.89192e-05	postive
MTMR10	SMG7-AS1	0.318297	0.000353041	postive
MTMR10	RNF185-AS1	0.391159	8.39534e-06	postive
MTMR10	RHPN1-AS1	0.332287	0.00018455	postive
MTMR10	RFPL3S	0.320915	0.000313424	postive
MTMR10	RBFADN	0.49386	7.45161e-09	postive
MTMR10	PTGER4P2-CDK2AP2P2	0.423274	1.18928e-06	postive
MTMR10	PRR34	0.371762	2.4856e-05	postive
MTMR10	PLAC4	0.4634	7.65844e-08	postive
MTMR10	PDCD4-AS1	0.303334	0.000682968	postive
MTMR10	NOP14-AS1	0.347876	8.62923e-05	postive
MTMR10	NDUFB2-AS1	0.370697	2.63302e-05	postive
MTMR10	NBR2	0.304504	0.000649431	postive
MTMR10	N4BP2L2-IT2	0.525411	5.17981e-10	postive
MTMR10	LINC01136	0.491541	8.97041e-09	postive
MTMR10	LINC00939	0.411444	2.50158e-06	postive
MTMR10	LINC00894	0.465855	6.39994e-08	postive
MTMR10	LINC00837	0.466082	6.29405e-08	postive
MTMR10	LINC00667	0.301242	0.000746933	postive
MTMR10	LINC00652	0.406492	3.38676e-06	postive
MTMR10	LINC00574	0.31489	0.000411528	postive
MTMR10	LINC00563	0.444103	2.99258e-07	postive
MTMR10	LINC00474	0.441013	3.69385e-07	postive
MTMR10	LINC00472	0.309426	0.000524252	postive
MTMR10	LINC00216	0.458889	1.06119e-07	postive
MTMR10	KIF25-AS1	0.339092	0.000133089	postive
MTMR10	KIAA0087	0.381349	1.46621e-05	postive
MTMR10	KCNQ1DN	0.322514	0.000291302	postive
MTMR10	HCG9	0.478715	2.44176e-08	postive
MTMR10	HAND2-AS1	0.313406	0.000439704	postive
MTMR10	GUSBP11	0.446944	2.46136e-07	postive
MTMR10	GSN-AS1	0.333945	0.000170545	postive
MTMR10	GS1-600G8.3	0.458657	1.07903e-07	postive
MTMR10	GK-AS1	0.550354	5.14085e-11	postive
MTMR10	FOXN3-AS2	0.335736	0.000156518	postive
MTMR10	FLJ13224	0.351319	7.25582e-05	postive
MTMR10	FAM182A	0.405437	3.61033e-06	postive
MTMR10	ERC2-IT1	0.397379	5.84076e-06	postive
MTMR10	EGOT	0.368254	3.00273e-05	postive
MTMR10	DTX2P1-UPK3BP1-PMS2P11	0.350337	7.6252e-05	postive
MTMR10	DLEU2L	0.383441	1.30377e-05	postive
MTMR10	DLEU1	0.379045	1.66702e-05	postive
MTMR10	DKFZP434A062	0.436341	5.0586e-07	postive
MTMR10	DIAPH2-AS1	0.418034	1.65894e-06	postive
MTMR10	DGCR11	0.35905	4.88033e-05	postive
MTMR10	DBET	0.452481	1.67315e-07	postive
MTMR10	CT62	0.451332	1.81368e-07	postive
MTMR10	CPS1-IT1	0.358985	4.89687e-05	postive
MTMR10	CADM3-AS1	0.435418	5.37994e-07	postive
MTMR10	C7orf69	0.300502	0.000770836	postive
MTMR10	C5orf66	0.402423	4.32847e-06	postive
MTMR10	ATXN8OS	0.392391	7.81791e-06	postive
MTMR10	ANKRD10-IT1	0.495592	6.48197e-09	postive
MTMR10	AGAP11	0.427762	8.90257e-07	postive
MTMR10	ADD3-AS1	0.356238	5.64419e-05	postive
MTMR10	AC007389.3	0.338774	0.000135158	postive
MTMR10	AC004490.1	0.326794	0.000238968	postive
MMP1	PDCD4-AS1	-0.316889	0.000376225	negative
MIF	SNHG17	0.310289	0.000504731	postive
MIF	RGS5	-0.307992	0.000558198	negative
MGLL	RGS5	0.335066	0.000161635	postive
METAP1	THAP9-AS1	0.496352	6.09546e-09	postive
METAP1	TCL6	0.43468	5.65067e-07	postive
METAP1	SNHG17	0.304125	0.000660103	postive
METAP1	SMG7-AS1	0.361708	4.24798e-05	postive
METAP1	RNF185-AS1	0.405534	3.58923e-06	postive
METAP1	RHPN1-AS1	0.376665	1.90146e-05	postive
METAP1	PTGER4P2-CDK2AP2P2	0.361038	4.39971e-05	postive
METAP1	PLAC4	0.320867	0.000314123	postive
METAP1	PART1	0.358452	5.03417e-05	postive
METAP1	NDUFB2-AS1	0.307992	0.000558198	postive
METAP1	NBR2	0.340354	0.000125154	postive
METAP1	N4BP2L2-IT2	0.32899	0.000215638	postive
METAP1	MCM3AP-AS1	0.339844	0.000128309	postive
METAP1	MAPKAPK5-AS1	0.363629	3.83976e-05	postive
METAP1	LINC01136	0.311705	0.000474153	postive
METAP1	LINC00894	0.377245	1.84166e-05	postive
METAP1	LINC00652	0.319197	0.000338931	postive
METAP1	LINC00563	0.372997	2.32437e-05	postive
METAP1	KIAA0087	0.37889	1.6814e-05	postive
METAP1	HAND2-AS1	0.551388	4.65217e-11	postive
METAP1	GUSBP11	0.325116	0.000258356	postive
METAP1	GS1-600G8.3	0.37441	2.152e-05	postive
METAP1	FLJ13224	0.31319	0.00044395	postive
METAP1	FAM182A	0.365023	3.56691e-05	postive
METAP1	ERC2-IT1	0.355812	5.76924e-05	postive
METAP1	DTX2P1-UPK3BP1-PMS2P11	0.401062	4.69529e-06	postive
METAP1	DLEU2L	0.394584	6.8812e-06	postive
METAP1	DLEU2	0.347074	8.98221e-05	postive
METAP1	DLEU1	0.466323	6.18377e-08	postive
METAP1	DKFZP434A062	0.388058	1.0033e-05	postive
METAP1	DIAPH2-AS1	0.327176	0.000234749	postive
METAP1	DBET	0.33714	0.000146285	postive
METAP1	CT62	0.429001	8.21267e-07	postive
METAP1	CPS1-IT1	0.341565	0.000117956	postive
METAP1	C22orf24	0.404093	3.91541e-06	postive
METAP1	BPESC1	0.317781	0.000361386	postive
METAP1	ATXN8OS	0.379381	1.63619e-05	postive
METAP1	AGAP11	0.357821	5.20137e-05	postive
METAP1	AC004490.1	0.340803	0.00012244	postive
MED6	THAP9-AS1	0.33185	0.000188415	postive
MED6	KLF3-AS1	0.353523	6.4867e-05	postive
MED6	HAND2-AS1	0.333578	0.000173551	postive
MED6	C22orf24	0.364947	3.58135e-05	postive
MED6	BPESC1	0.321226	0.00030901	postive
MED6	ARMC2-AS1	0.331195	0.000194353	postive
MED31	MAPKAPK5-AS1	0.386322	1.10767e-05	postive
MED31	LINC01136	0.318517	0.000349553	postive
MED31	LINC00652	0.328788	0.000217691	postive
MED31	GK-AS1	0.309249	0.000528332	postive
MED31	DGCR11	0.37103	2.58611e-05	postive
MED27	WT1-AS	0.434524	5.70955e-07	postive
MED27	SMG7-AS1	0.345655	9.64007e-05	postive
MED27	RNF185-AS1	0.382503	1.37436e-05	postive
MED27	RFPL3S	0.30854	0.000544999	postive
MED27	RBFADN	0.354761	6.08889e-05	postive
MED27	PTGER4P2-CDK2AP2P2	0.419754	1.48822e-06	postive
MED27	PRR34	0.448184	2.25885e-07	postive
MED27	PLAC4	0.392345	7.83892e-06	postive
MED27	PART1	0.409444	2.82875e-06	postive
MED27	NBR2	0.392394	7.81658e-06	postive
MED27	MYCNOS	0.348435	8.39102e-05	postive
MED27	MEG3	0.31272	0.000453314	postive
MED27	MAPKAPK5-AS1	0.311542	0.000477595	postive
MED27	LINC01278	0.321783	0.000301237	postive
MED27	LINC01136	0.400157	4.95512e-06	postive
MED27	LINC00963	0.306785	0.000588335	postive
MED27	LINC00939	0.367669	3.09823e-05	postive
MED27	LINC00894	0.305457	0.000623215	postive
MED27	LINC00652	0.382026	1.41162e-05	postive
MED27	LINC00574	0.351857	7.06065e-05	postive
MED27	LINC00563	0.41062	2.63175e-06	postive
MED27	LINC00474	0.384423	1.2335e-05	postive
MED27	KIAA0087	0.333623	0.000173184	postive
MED27	IGF2-AS	0.334311	0.000167586	postive
MED27	HCG9	0.311737	0.000473495	postive
MED27	GUSBP11	0.323059	0.000284089	postive
MED27	GS1-600G8.3	0.359776	4.69937e-05	postive
MED27	FOXN3-AS2	0.373657	2.24233e-05	postive
MED27	FAM224A	0.352	7.00938e-05	postive
MED27	FAM182A	0.333942	0.000170562	postive
MED27	ERC2-IT1	0.385807	1.14052e-05	postive
MED27	ENTPD1-AS1	0.31292	0.000449305	postive
MED27	EGOT	0.466445	6.12836e-08	postive
MED27	DSCR4	0.317131	0.000372141	postive
MED27	DLEU1	0.351452	7.20715e-05	postive
MED27	DKFZP434A062	0.437797	4.58875e-07	postive
MED27	DIAPH2-AS1	0.345126	9.89637e-05	postive
MED27	DGCR5	0.334168	0.000168732	postive
MED27	DBET	0.38364	1.28922e-05	postive
MED27	CT62	0.383189	1.32236e-05	postive
MED27	CADM3-AS1	0.504449	3.13828e-09	postive
MED27	C5orf66	0.419833	1.48073e-06	postive
MED27	ATXN8OS	0.380833	1.50911e-05	postive
MED27	AGAP11	0.360669	4.48539e-05	postive
MED27	ADD3-AS1	0.357835	5.19754e-05	postive
MED27	AC007389.3	0.346398	9.29018e-05	postive
MDH1	SNHG17	0.362192	4.14152e-05	postive
MDH1	MAPKAPK5-AS1	0.30758	0.000568335	postive
MDH1	HAND2-AS1	0.377573	1.8086e-05	postive
MDH1	AC005838.2	-0.303993	0.000663868	negative
MCAT	SNHG17	0.336716	0.000149308	postive
LSS	THAP9-AS1	0.328089	0.000224949	postive
LSS	TCL6	0.412288	2.37449e-06	postive
LSS	RNF185-AS1	0.323313	0.000280794	postive
LSS	RBFADN	0.377415	1.82444e-05	postive
LSS	PTGER4P2-CDK2AP2P2	0.387605	1.0296e-05	postive
LSS	MCM3AP-AS1	0.537308	1.76207e-10	postive
LSS	LINC00963	0.327311	0.000233278	postive
LSS	LINC00894	0.342413	0.000113149	postive
LSS	LINC00588	0.349147	8.09631e-05	postive
LSS	HLA-F-AS1	0.304429	0.000651532	postive
LSS	HAND2-AS1	0.371388	2.53646e-05	postive
LSS	GS1-600G8.3	0.308404	0.000548236	postive
LSS	FLJ13224	0.328636	0.000219259	postive
LSS	FAM224A	0.388953	9.53192e-06	postive
LSS	FAM182A	0.345021	9.94814e-05	postive
LSS	FAM106A	0.395176	6.64741e-06	postive
LSS	ERC2-IT1	0.337817	0.000141574	postive
LSS	ENTPD1-AS1	0.392542	7.74986e-06	postive
LSS	DTX2P1-UPK3BP1-PMS2P11	0.300408	0.000773923	postive
LSS	DLEU2L	0.313192	0.00044391	postive
LSS	DKFZP434A062	0.338948	0.000134024	postive
LSS	DGCR5	0.322191	0.000295655	postive
LSS	DBET	0.369413	2.82161e-05	postive
LSS	CT62	0.347464	8.80896e-05	postive
LSS	CPS1-IT1	0.409893	2.75198e-06	postive
LSS	C5orf66	0.343959	0.000104851	postive
LSS	BPESC1	0.355215	5.94886e-05	postive
LSS	AGAP11	0.403683	4.01316e-06	postive
LSS	AC004490.1	0.391423	8.26853e-06	postive
LPCAT4	MAPKAPK5-AS1	0.387527	1.03418e-05	postive
LPCAT4	IGF2-AS	0.33913	0.000132844	postive
LPCAT4	GUSBP11	0.301162	0.00074947	postive
LPCAT4	DGCR11	0.378477	1.7204e-05	postive
LPCAT4	CYB561D2	0.322935	0.000285712	postive
LPCAT3	WT1-AS	0.407681	3.15053e-06	postive
LPCAT3	TCL6	0.393143	7.4841e-06	postive
LPCAT3	RNF185-AS1	0.479027	2.38414e-08	postive
LPCAT3	RBFADN	0.430474	7.45865e-07	postive
LPCAT3	PTGER4P2-CDK2AP2P2	0.470125	4.66815e-08	postive
LPCAT3	PRR34	0.312023	0.000467527	postive
LPCAT3	PLAC4	0.374884	2.09682e-05	postive
LPCAT3	PART1	0.340265	0.000125698	postive
LPCAT3	NDUFB2-AS1	0.304243	0.00065678	postive
LPCAT3	LINC01136	0.421245	1.35378e-06	postive
LPCAT3	LINC00939	0.300259	0.000778816	postive
LPCAT3	LINC00652	0.353994	6.3326e-05	postive
LPCAT3	LINC00574	0.306201	0.000603452	postive
LPCAT3	LINC00563	0.385741	1.14484e-05	postive
LPCAT3	LINC00474	0.525459	5.15795e-10	postive
LPCAT3	LINC00216	0.418509	1.61001e-06	postive
LPCAT3	KIAA0087	0.332345	0.000184043	postive
LPCAT3	HCG9	0.314731	0.000414473	postive
LPCAT3	HAND2-AS1	0.335919	0.000155153	postive
LPCAT3	GUSBP11	0.484925	1.5114e-08	postive
LPCAT3	GS1-600G8.3	0.473762	3.55566e-08	postive
LPCAT3	GK-AS1	0.392513	7.76299e-06	postive
LPCAT3	FLJ13224	0.408148	3.062e-06	postive
LPCAT3	FAM224A	0.340239	0.000125858	postive
LPCAT3	FAM182A	0.429079	8.17089e-07	postive
LPCAT3	DTX2P1-UPK3BP1-PMS2P11	0.316569	0.000381667	postive
LPCAT3	DKFZP434A062	0.486979	1.28693e-08	postive
LPCAT3	DIAPH2-AS1	0.351789	7.08483e-05	postive
LPCAT3	DGCR11	0.356919	5.44946e-05	postive
LPCAT3	DBET	0.481242	2.01111e-08	postive
LPCAT3	CT62	0.453521	1.55498e-07	postive
LPCAT3	CPS1-IT1	0.345956	9.49694e-05	postive
LPCAT3	CADM3-AS1	0.392054	7.97195e-06	postive
LPCAT3	C5orf66	0.341213	0.00012001	postive
LPCAT3	ATXN8OS	0.435862	5.22298e-07	postive
LPCAT3	AGAP11	0.462923	7.92912e-08	postive
LPCAT3	AC007389.3	0.34775	8.68367e-05	postive
LGALS1	ACVR2B-AS1	-0.323957	0.000272579	negative
LDHA	RGS5	-0.367864	3.06619e-05	negative
LDHA	DLEU1	0.315412	0.000402027	postive
INSR	ANKRD10-IT1	0.321559	0.000304341	postive
INSIG1	THAP9-AS1	0.384634	1.21889e-05	postive
INSIG1	RNF185-AS1	0.300755	0.000762569	postive
INSIG1	KLF3-AS1	0.337124	0.000146399	postive
INSIG1	KIAA0087	0.334807	0.000163654	postive
INSIG1	HEXA-AS1	0.321919	0.000299359	postive
INSIG1	FAM66D	0.314718	0.000414704	postive
INSIG1	FAM224A	0.337116	0.000146457	postive
INSIG1	ENTPD1-AS1	0.301853	0.000727706	postive
INSIG1	DLEU2L	0.35226	6.91774e-05	postive
INSIG1	DLEU2	0.359797	4.69415e-05	postive
INSIG1	CPS1-IT1	0.391764	8.10682e-06	postive
INSIG1	C22orf24	0.349371	8.00562e-05	postive
INSIG1	BPESC1	0.429398	8.0026e-07	postive
INSIG1	AC004490.1	0.38891	9.55549e-06	postive
INPP5D	TP53TG1	0.30855	0.000544745	postive
INPP5D	THAP9-AS1	-0.311063	0.000487805	negative
INPP5D	HCP5	0.334677	0.000164676	postive
INPP5D	GUSBP11	0.301409	0.000741621	postive
INPP4A	WT1-AS	0.362359	4.10537e-05	postive
INPP4A	TCL6	0.390721	8.61044e-06	postive
INPP4A	SMG7-AS1	0.408081	3.07458e-06	postive
INPP4A	RNF185-AS1	0.382072	1.40805e-05	postive
INPP4A	RHPN1-AS1	0.316439	0.000383918	postive
INPP4A	RBFADN	0.436825	4.8976e-07	postive
INPP4A	PTGER4P2-CDK2AP2P2	0.372225	2.42393e-05	postive
INPP4A	PLAC4	0.387237	1.05142e-05	postive
INPP4A	PART1	0.31607	0.000390336	postive
INPP4A	NOP14-AS1	0.321204	0.000309322	postive
INPP4A	N4BP2L2-IT2	0.470325	4.59912e-08	postive
INPP4A	MYCNOS	0.339416	0.000131006	postive
INPP4A	MCM3AP-AS1	0.340911	0.000121797	postive
INPP4A	LINC01136	0.370763	2.62367e-05	postive
INPP4A	LINC00939	0.310137	0.000508125	postive
INPP4A	LINC00894	0.510413	1.90319e-09	postive
INPP4A	LINC00837	0.392045	7.97638e-06	postive
INPP4A	LINC00667	0.331501	0.000191562	postive
INPP4A	LINC00652	0.453695	1.53603e-07	postive
INPP4A	LINC00563	0.401499	4.57443e-06	postive
INPP4A	LINC00474	0.352373	6.87808e-05	postive
INPP4A	LINC00472	0.322101	0.000296873	postive
INPP4A	LINC00216	0.508776	2.18524e-09	postive
INPP4A	KIF25-AS1	0.370185	2.70672e-05	postive
INPP4A	KIAA0087	0.337994	0.000140368	postive
INPP4A	INE1	0.310584	0.000498223	postive
INPP4A	HEXA-AS1	0.336804	0.000148674	postive
INPP4A	HCG9	0.328189	0.000223896	postive
INPP4A	HAND2-AS1	0.385335	1.17151e-05	postive
INPP4A	GUSBP11	0.449559	2.05299e-07	postive
INPP4A	GSN-AS1	0.402409	4.332e-06	postive
INPP4A	GS1-600G8.3	0.404082	3.9179e-06	postive
INPP4A	GK-AS1	0.36641	3.3136e-05	postive
INPP4A	FLJ13224	0.414879	2.02163e-06	postive
INPP4A	FAM182B	0.311412	0.000480341	postive
INPP4A	FAM182A	0.339516	0.000130373	postive
INPP4A	FAM106A	0.303454	0.000679462	postive
INPP4A	DTX2P1-UPK3BP1-PMS2P11	0.520876	7.72892e-10	postive
INPP4A	DLEU2L	0.322748	0.000288187	postive
INPP4A	DKFZP434A062	0.43218	6.66716e-07	postive
INPP4A	DIAPH2-AS1	0.316722	0.000379054	postive
INPP4A	DGCR11	0.34738	8.84571e-05	postive
INPP4A	DBET	0.378844	1.68568e-05	postive
INPP4A	CT62	0.393841	7.18627e-06	postive
INPP4A	CPS1-IT1	0.307289	0.000575582	postive
INPP4A	C5orf66	0.367306	3.15892e-05	postive
INPP4A	C22orf24	0.334119	0.000169128	postive
INPP4A	ATXN8OS	0.382946	1.34056e-05	postive
INPP4A	ANKRD10-IT1	0.433277	6.20123e-07	postive
INPP4A	AGAP11	0.363668	3.83204e-05	postive
INPP4A	ACVR2B-AS1	0.304743	0.000642755	postive
INPP4A	AC004490.1	0.365366	3.50271e-05	postive
ILK	WT1-AS	0.30631	0.000600612	postive
ILK	SMAD5-AS1	0.388332	9.87722e-06	postive
ILK	RNF185-AS1	0.503573	3.37482e-09	postive
ILK	PTGER4P2-CDK2AP2P2	0.381225	1.47635e-05	postive
ILK	PRR34	0.431569	6.94116e-07	postive
ILK	PLAC4	0.345651	9.64185e-05	postive
ILK	MYCNOS	0.352995	6.66383e-05	postive
ILK	LINC00588	0.303519	0.000677558	postive
ILK	LINC00472	0.300932	0.000756866	postive
ILK	KLF3-AS1	0.337827	0.00014151	postive
ILK	KIAA0087	0.367121	3.19031e-05	postive
ILK	HEXA-AS1	0.450511	1.92093e-07	postive
ILK	GUSBP11	0.469307	4.96059e-08	postive
ILK	GS1-600G8.3	0.31409	0.000426497	postive
ILK	FLJ13224	0.347128	8.95798e-05	postive
ILK	FAM66D	0.333187	0.000176823	postive
ILK	FAM224A	0.456634	1.24692e-07	postive
ILK	FAM182A	0.311415	0.000480272	postive
ILK	FAM106A	0.317052	0.000373458	postive
ILK	ERC2-IT1	0.324143	0.000270252	postive
ILK	EGOT	0.359242	4.83186e-05	postive
ILK	DTX2P1-UPK3BP1-PMS2P11	0.485775	1.41425e-08	postive
ILK	DKFZP434A062	0.380987	1.49611e-05	postive
ILK	DBET	0.395305	6.59744e-06	postive
ILK	CT62	0.324755	0.00026271	postive
ILK	CPS1-IT1	0.444864	2.84058e-07	postive
ILK	C22orf24	0.438313	4.43245e-07	postive
ILK	BPESC1	0.356745	5.49864e-05	postive
ILK	ATXN8OS	0.44659	2.52229e-07	postive
ILK	AGAP11	0.376694	1.89849e-05	postive
ILK	AC004490.1	0.411691	2.46374e-06	postive
IDI1	THAP9-AS1	0.349449	7.97406e-05	postive
IDI1	LINC00588	0.320378	0.000321206	postive
IDI1	LINC00342	0.322117	0.000296658	postive
IDI1	HEXA-AS1	0.338358	0.000137915	postive
IDI1	CPS1-IT1	0.322458	0.000292052	postive
IDI1	C22orf24	0.359384	4.79611e-05	postive
IDI1	AC004490.1	0.355445	5.8791e-05	postive
IDH3B	SNHG17	0.319789	0.000329943	postive
IDH3B	POLR2J4	0.355558	5.84493e-05	postive
IDH3B	LINC00963	-0.333431	0.000174775	negative
IDH1	TP53TG1	0.304329	0.000654333	postive
IDH1	HEXA-AS1	0.428509	8.48055e-07	postive
HSPH1	MCF2L-AS1	0.336286	0.000152432	postive
HSPH1	IGF2-AS	0.326588	0.000241276	postive
HSPH1	HEXA-AS1	0.32077	0.000315519	postive
HSPH1	HAND2-AS1	0.308519	0.0005455	postive
HSP90AA1	WT1-AS	0.563457	1.41262e-11	postive
HSP90AA1	RFPL3S	0.318772	0.000345534	postive
HSP90AA1	RBFADN	0.337717	0.000142262	postive
HSP90AA1	PTGER4P2-CDK2AP2P2	0.368135	3.02205e-05	postive
HSP90AA1	PRR34	0.309514	0.000522228	postive
HSP90AA1	PRORY	0.34177	0.00011678	postive
HSP90AA1	PLAC4	0.395302	6.59851e-06	postive
HSP90AA1	PART1	0.524755	5.49089e-10	postive
HSP90AA1	NDUFB2-AS1	0.364255	3.71504e-05	postive
HSP90AA1	NBR2	0.382462	1.37758e-05	postive
HSP90AA1	N4BP2L2-IT2	0.354962	6.02649e-05	postive
HSP90AA1	MYCNOS	0.391663	8.15472e-06	postive
HSP90AA1	MCF2L-AS1	0.43032	7.5339e-07	postive
HSP90AA1	LINC01136	0.38572	1.14617e-05	postive
HSP90AA1	LINC00963	0.339268	0.000131957	postive
HSP90AA1	LINC00939	0.336975	0.000147457	postive
HSP90AA1	LINC00652	0.421533	1.3292e-06	postive
HSP90AA1	LINC00563	0.390497	8.72243e-06	postive
HSP90AA1	LINC00474	0.389369	9.30692e-06	postive
HSP90AA1	LINC00472	0.36114	4.37625e-05	postive
HSP90AA1	LINC00216	0.311353	0.000481588	postive
HSP90AA1	KIAA0087	0.319932	0.0003278	postive
HSP90AA1	IGF2-AS	0.400446	4.87077e-06	postive
HSP90AA1	HCG9	0.378689	1.70028e-05	postive
HSP90AA1	HCG18	0.310343	0.000503532	postive
HSP90AA1	HAND2-AS1	0.357788	5.21039e-05	postive
HSP90AA1	GS1-600G8.3	0.347667	8.71993e-05	postive
HSP90AA1	FOXN3-AS2	0.304796	0.000641279	postive
HSP90AA1	FLJ13224	0.386332	1.10706e-05	postive
HSP90AA1	FAM224A	0.387884	1.01333e-05	postive
HSP90AA1	FAM182A	0.444188	2.97521e-07	postive
HSP90AA1	ERC2-IT1	0.464195	7.22684e-08	postive
HSP90AA1	ENTPD1-AS1	0.423163	1.19775e-06	postive
HSP90AA1	EGOT	0.366649	3.27161e-05	postive
HSP90AA1	DSCR4	0.321397	0.000306596	postive
HSP90AA1	DLEU1	0.346772	9.11866e-05	postive
HSP90AA1	DKFZP434A062	0.352429	6.85844e-05	postive
HSP90AA1	DIAPH2-AS1	0.312894	0.000449822	postive
HSP90AA1	DBET	0.344333	0.000102927	postive
HSP90AA1	CT62	0.407369	3.21094e-06	postive
HSP90AA1	CADM3-AS1	0.395024	6.70653e-06	postive
HSP90AA1	C7orf69	0.348507	8.36053e-05	postive
HSP90AA1	C5orf66	0.38894	9.53883e-06	postive
HSP90AA1	C22orf24	0.364288	3.70856e-05	postive
HSP90AA1	ATXN8OS	0.343408	0.00010774	postive
HSP90AA1	AGAP11	0.382694	1.35972e-05	postive
HSP90AA1	ADD3-AS1	0.416478	1.82937e-06	postive
HSP90AA1	ACVR2B-AS1	0.37022	2.70166e-05	postive
HSDL2	THAP9-AS1	0.360439	4.53959e-05	postive
HSDL2	RFPL3S	0.323561	0.000277606	postive
HSDL2	RBFADN	0.362117	4.15783e-05	postive
HSDL2	NDUFB2-AS1	0.335816	0.000155922	postive
HSDL2	NBR2	0.4459	2.64528e-07	postive
HSDL2	MCM3AP-AS1	0.310421	0.000501803	postive
HSDL2	LINC00963	0.332989	0.000178492	postive
HSDL2	HCG18	0.372338	2.40917e-05	postive
HSDL2	FAM66D	0.339041	0.00013342	postive
HSDL2	FAM224A	0.433058	6.29165e-07	postive
HSDL2	ERC2-IT1	0.395563	6.49827e-06	postive
HSDL2	ENTPD1-AS1	0.446272	2.57817e-07	postive
HSDL2	DLEU2L	0.312559	0.000456564	postive
HSDL2	CPS1-IT1	0.327997	0.00022592	postive
HSDL2	CADM3-AS1	0.319145	0.000339728	postive
HSDL2	BPESC1	0.370149	2.71203e-05	postive
HSDL2	ANKRD10-IT1	0.331233	0.000194009	postive
HSD17B4	THAP9-AS1	0.323756	0.000275115	postive
HSD17B4	RFPL3S	0.321019	0.000311952	postive
HSD17B4	HAND2-AS1	0.36484	3.60173e-05	postive
HSD17B4	BPESC1	0.334026	0.000169882	postive
HSD17B3	WT1-AS	0.443052	3.21555e-07	postive
HSD17B3	TCL6	0.440626	3.79209e-07	postive
HSD17B3	SMG7-AS1	0.472802	3.82165e-08	postive
HSD17B3	SMAD5-AS1	0.3342	0.000168476	postive
HSD17B3	RPARP-AS1	0.306674	0.000591193	postive
HSD17B3	RNF185-AS1	0.525608	5.09004e-10	postive
HSD17B3	RFPL3S	0.484326	1.58359e-08	postive
HSD17B3	RFPL1S	0.32044	0.000320297	postive
HSD17B3	RBFADN	0.422925	1.21616e-06	postive
HSD17B3	PTGER4P2-CDK2AP2P2	0.446441	2.54831e-07	postive
HSD17B3	PRR34	0.429222	8.09527e-07	postive
HSD17B3	PLAC4	0.456845	1.22835e-07	postive
HSD17B3	PART1	0.416554	1.82061e-06	postive
HSD17B3	NBR2	0.318257	0.000353683	postive
HSD17B3	N4BP2L2-IT2	0.502997	3.5395e-09	postive
HSD17B3	MYCNOS	0.503191	3.48321e-09	postive
HSD17B3	MCM3AP-AS1	0.319691	0.000331414	postive
HSD17B3	MCF2L-AS1	0.326483	0.000242453	postive
HSD17B3	LINC01136	0.550453	5.09228e-11	postive
HSD17B3	LINC00939	0.587037	1.19157e-12	postive
HSD17B3	LINC00894	0.416056	1.8783e-06	postive
HSD17B3	LINC00652	0.44803	2.2831e-07	postive
HSD17B3	LINC00574	0.534447	2.29244e-10	postive
HSD17B3	LINC00563	0.566386	1.05002e-11	postive
HSD17B3	LINC00474	0.506593	2.62466e-09	postive
HSD17B3	LINC00472	0.364984	3.57441e-05	postive
HSD17B3	LINC00339	0.311096	0.00048709	postive
HSD17B3	LINC00216	0.412056	2.4088e-06	postive
HSD17B3	KLF3-AS1	0.325678	0.000251706	postive
HSD17B3	KIAA0087	0.588032	1.06889e-12	postive
HSD17B3	IDI2-AS1	0.300696	0.000764479	postive
HSD17B3	HEXA-AS1	0.487022	1.28254e-08	postive
HSD17B3	HCG9	0.433336	6.17734e-07	postive
HSD17B3	HAND2-AS1	0.509166	2.11458e-09	postive
HSD17B3	GUSBP11	0.44409	2.9952e-07	postive
HSD17B3	GSN-AS1	0.45962	1.00685e-07	postive
HSD17B3	GS1-600G8.3	0.527371	4.34947e-10	postive
HSD17B3	GK-AS1	0.382142	1.40251e-05	postive
HSD17B3	FOXN3-AS2	0.360653	4.4891e-05	postive
HSD17B3	FLJ13224	0.320311	0.000322184	postive
HSD17B3	FAM66D	0.342307	0.000113739	postive
HSD17B3	FAM224A	0.334136	0.00016899	postive
HSD17B3	FAM215A	0.392599	7.72408e-06	postive
HSD17B3	FAM182A	0.39845	5.48297e-06	postive
HSD17B3	ERC2-IT1	0.305904	0.000611275	postive
HSD17B3	ENTPD1-AS1	0.357438	5.30539e-05	postive
HSD17B3	EGOT	0.459226	1.03584e-07	postive
HSD17B3	DTX2P1-UPK3BP1-PMS2P11	0.4642	7.22441e-08	postive
HSD17B3	DSCR4	0.300195	0.00078096	postive
HSD17B3	DLEU2L	0.551559	4.57593e-11	postive
HSD17B3	DLEU1	0.451839	1.75042e-07	postive
HSD17B3	DKFZP434A062	0.547375	6.84307e-11	postive
HSD17B3	DIAPH2-AS1	0.577113	3.45587e-12	postive
HSD17B3	DGCR5	0.370912	2.60263e-05	postive
HSD17B3	DBET	0.430168	7.60937e-07	postive
HSD17B3	CTC-338M12.4	0.354937	6.03444e-05	postive
HSD17B3	CT62	0.454735	1.4271e-07	postive
HSD17B3	CPS1-IT1	0.487878	1.19905e-08	postive
HSD17B3	CADM3-AS1	0.540949	1.25605e-10	postive
HSD17B3	C7orf69	0.344466	0.000102254	postive
HSD17B3	C5orf66	0.428832	8.30367e-07	postive
HSD17B3	C22orf24	0.483693	1.66358e-08	postive
HSD17B3	BPESC1	0.529063	3.7368e-10	postive
HSD17B3	ATXN8OS	0.499977	4.53792e-09	postive
HSD17B3	AGAP11	0.341361	0.000119143	postive
HSD17B3	ADD3-AS1	0.502589	3.66085e-09	postive
HSD17B3	AC007389.3	0.4318	6.83639e-07	postive
HSD17B3	AC004490.1	0.407919	3.10509e-06	postive
HSD17B12	RNF185-AS1	0.441946	3.46724e-07	postive
HSD17B12	PTGER4P2-CDK2AP2P2	0.36987	2.75317e-05	postive
HSD17B12	HEXA-AS1	0.497508	5.55031e-09	postive
HSD17B12	HAND2-AS1	0.341081	0.000120784	postive
HSD17B12	GUSBP11	0.319121	0.000340112	postive
HSD17B12	GS1-600G8.3	0.375198	2.06106e-05	postive
HSD17B12	FLJ13224	0.393235	7.44415e-06	postive
HSD17B12	FAM224A	0.316012	0.000391347	postive
HSD17B12	FAM182A	0.324917	0.000260744	postive
HSD17B12	ERC2-IT1	0.332474	0.000182924	postive
HSD17B12	ENTPD1-AS1	0.328418	0.000221505	postive
HSD17B12	DLEU2L	0.376777	1.88983e-05	postive
HSD17B12	DLEU2	0.347044	8.99567e-05	postive
HSD17B12	DLEU1	0.348155	8.50929e-05	postive
HSD17B12	DKFZP434A062	0.352495	6.83546e-05	postive
HSD17B12	DBET	0.384261	1.24487e-05	postive
HSD17B12	CT62	0.396461	6.16483e-06	postive
HSD17B12	CPS1-IT1	0.405312	3.63766e-06	postive
HSD17B12	C22orf24	0.310473	0.00050065	postive
HSD17B12	BPESC1	0.402804	4.23079e-06	postive
HSD17B12	ATXN8OS	0.397006	5.97029e-06	postive
HSD17B12	AGAP11	0.353673	6.43744e-05	postive
HPGDS	RGS5	0.335056	0.000161712	postive
HMGCL	WT1-AS	0.314664	0.000415706	postive
HMGCL	PTGER4P2-CDK2AP2P2	0.326116	0.00024663	postive
HMGCL	PRR34	0.475126	3.20785e-08	postive
HMGCL	PRORY	0.347806	8.65939e-05	postive
HMGCL	POLR2J4	0.30508	0.000633458	postive
HMGCL	PLAC4	0.332558	0.000182191	postive
HMGCL	PART1	0.361516	4.29091e-05	postive
HMGCL	MAPKAPK5-AS1	0.314351	0.000421557	postive
HMGCL	LINC00339	0.375798	1.99432e-05	postive
HMGCL	KCNQ1DN	0.328043	0.000225433	postive
HMGCL	GUSBP11	0.423822	1.14821e-06	postive
HMGCL	DLEU1	0.322455	0.000292091	postive
HMGCL	DKFZP434A062	0.302029	0.000722226	postive
HMGCL	DGCR11	0.363345	3.8977e-05	postive
HMGCL	CADM3-AS1	0.32216	0.000296069	postive
HMGCL	C5orf66	0.319971	0.000327214	postive
HMGCL	AC007389.3	0.313704	0.000433908	postive
HCCS	GUSBP11	0.315834	0.000394497	postive
HADHB	RPARP-AS1	0.315946	0.000392518	postive
HADHB	RNF185-AS1	0.31462	0.00041652	postive
HADHB	PTGER4P2-CDK2AP2P2	0.301455	0.000740159	postive
HADHB	PLAC4	0.348076	8.54328e-05	postive
HADHB	NDUFB2-AS1	0.355925	5.73579e-05	postive
HADHB	MYCNOS	0.354403	6.20171e-05	postive
HADHB	MAPKAPK5-AS1	0.381328	1.46794e-05	postive
HADHB	LINC01136	0.367894	3.06126e-05	postive
HADHB	LINC00939	0.409784	2.77051e-06	postive
HADHB	LINC00652	0.364444	3.67799e-05	postive
HADHB	LINC00563	0.387599	1.02996e-05	postive
HADHB	LINC00474	0.356725	5.50441e-05	postive
HADHB	HEXA-AS1	0.402344	4.34891e-06	postive
HADHB	HCG9	0.431188	7.11696e-07	postive
HADHB	HAND2-AS1	0.336523	0.000150707	postive
HADHB	GUSBP11	0.301838	0.000728145	postive
HADHB	GS1-600G8.3	0.310558	0.000498778	postive
HADHB	FAM182A	0.395901	6.37109e-06	postive
HADHB	CT62	0.344843	0.00010036	postive
HADHB	C7orf69	0.305333	0.000626585	postive
HADHB	ATXN8OS	0.335994	0.000154593	postive
HADHA	LINC00588	0.350156	7.69492e-05	postive
HADHA	HEXA-AS1	0.351244	7.28318e-05	postive
HADHA	CPS1-IT1	0.301324	0.000744326	postive
HADHA	C22orf24	0.31858	0.000348549	postive
GRHPR	RPARP-AS1	0.319796	0.000329834	postive
GRHPR	FAM182A	0.323147	0.000282941	postive
GPX1	SMG7-AS1	-0.302275	0.000714695	negative
GPX1	RBFADN	-0.386557	1.09296e-05	negative
GPX1	PTGER4P2-CDK2AP2P2	-0.302886	0.000696205	negative
GPX1	PLAC4	-0.329763	0.000207945	negative
GPX1	PART1	-0.321733	0.000301917	negative
GPX1	LINC01136	-0.336483	0.000150996	negative
GPX1	LINC00574	-0.317133	0.000372111	negative
GPX1	HLA-F-AS1	-0.341168	0.000120272	negative
GPX1	GSN-AS1	-0.328974	0.000215806	negative
GPX1	GK-AS1	-0.321541	0.000304588	negative
GPX1	FOXN3-AS2	-0.366397	3.31582e-05	negative
GPX1	ERC2-IT1	-0.392731	7.66501e-06	negative
GPX1	DLEU2L	-0.363989	3.76759e-05	negative
GPX1	DIAPH2-AS1	-0.346487	9.24916e-05	negative
GPX1	DGCR5	-0.395917	6.3648e-06	negative
GPX1	CYB561D2	0.496984	5.79152e-09	postive
GPX1	CT62	-0.347124	8.95967e-05	negative
GPX1	CADM3-AS1	-0.368632	2.94259e-05	negative
GPX1	C5orf66	-0.311959	0.000468871	negative
GPX1	ACVR2B-AS1	-0.39366	7.26206e-06	negative
GPX1	AC005838.2	-0.319303	0.000337303	negative
GPD2	WT1-AS	0.521906	7.06131e-10	postive
GPD2	TCL6	0.399502	5.15166e-06	postive
GPD2	SMG7-AS1	0.470667	4.48347e-08	postive
GPD2	RPARP-AS1	0.388179	9.96365e-06	postive
GPD2	RNF185-AS1	0.406714	3.34141e-06	postive
GPD2	RHPN1-AS1	0.309354	0.000525909	postive
GPD2	RBFADN	0.384918	1.19944e-05	postive
GPD2	PTGER4P2-CDK2AP2P2	0.428079	8.72089e-07	postive
GPD2	PRR34	0.517814	1.0093e-09	postive
GPD2	PLAC4	0.458078	1.12474e-07	postive
GPD2	PART1	0.365324	3.51051e-05	postive
GPD2	NOP14-AS1	0.305068	0.000633796	postive
GPD2	NDUFB2-AS1	0.351705	7.11535e-05	postive
GPD2	NBR2	0.379413	1.63325e-05	postive
GPD2	N4BP2L2-IT2	0.491239	9.18892e-09	postive
GPD2	MYCNOS	0.411958	2.42339e-06	postive
GPD2	MCF2L-AS1	0.417001	1.77029e-06	postive
GPD2	LINC01136	0.445134	2.78831e-07	postive
GPD2	LINC00939	0.455994	1.30505e-07	postive
GPD2	LINC00894	0.423006	1.20983e-06	postive
GPD2	LINC00652	0.444702	2.87227e-07	postive
GPD2	LINC00574	0.33786	0.000141283	postive
GPD2	LINC00563	0.476101	2.97956e-08	postive
GPD2	LINC00474	0.470194	4.64399e-08	postive
GPD2	LINC00472	0.391472	8.24512e-06	postive
GPD2	LINC00216	0.478145	2.55035e-08	postive
GPD2	KIAA0087	0.440256	3.88836e-07	postive
GPD2	HLA-F-AS1	0.307299	0.000575332	postive
GPD2	HEXA-AS1	0.384157	1.25222e-05	postive
GPD2	HCG9	0.456968	1.21756e-07	postive
GPD2	HCG18	0.311686	0.000474556	postive
GPD2	HAND2-AS1	0.339212	0.000132317	postive
GPD2	GUSBP11	0.463385	7.66648e-08	postive
GPD2	GS1-600G8.3	0.389814	9.0722e-06	postive
GPD2	GK-AS1	0.431381	7.02748e-07	postive
GPD2	FOXN3-AS2	0.342782	0.000111114	postive
GPD2	FLJ13224	0.39218	7.91393e-06	postive
GPD2	FAM66D	0.347958	8.59386e-05	postive
GPD2	FAM224A	0.355725	5.79499e-05	postive
GPD2	FAM182A	0.52203	6.98445e-10	postive
GPD2	FAM106A	0.301643	0.000734235	postive
GPD2	ERC2-IT1	0.433323	6.18243e-07	postive
GPD2	ENTPD1-AS1	0.318085	0.000356454	postive
GPD2	EGOT	0.376733	1.89435e-05	postive
GPD2	DTX2P1-UPK3BP1-PMS2P11	0.464033	7.31317e-08	postive
GPD2	DLEU2L	0.409729	2.77977e-06	postive
GPD2	DLEU1	0.316108	0.000389673	postive
GPD2	DKFZP434A062	0.409038	2.90001e-06	postive
GPD2	DIAPH2-AS1	0.341823	0.000116475	postive
GPD2	DGCR5	0.36138	4.32179e-05	postive
GPD2	DBET	0.449876	2.00801e-07	postive
GPD2	CT62	0.467353	5.73211e-08	postive
GPD2	CPS1-IT1	0.310448	0.000501212	postive
GPD2	CADM3-AS1	0.42216	1.27705e-06	postive
GPD2	C7orf69	0.405197	3.66311e-06	postive
GPD2	C5orf66	0.367728	3.08852e-05	postive
GPD2	C22orf24	0.374129	2.18519e-05	postive
GPD2	BPESC1	0.322838	0.000286994	postive
GPD2	ATXN8OS	0.377958	1.77051e-05	postive
GPD2	ANKRD10-IT1	0.476101	2.9796e-08	postive
GPD2	AGAP11	0.506085	2.73865e-09	postive
GPD2	ADD3-AS1	0.459809	9.93276e-08	postive
GPD2	AC004490.1	0.445855	2.65344e-07	postive
GOT2	MAPKAPK5-AS1	0.350845	7.43187e-05	postive
GOT2	LINC00652	0.349668	7.88663e-05	postive
GOT2	ATXN8OS	0.301883	0.000726758	postive
GNPAT	WT1-AS	0.344228	0.000103464	postive
GNPAT	RBFADN	0.343834	0.000105498	postive
GNPAT	PTGER4P2-CDK2AP2P2	0.35504	6.00267e-05	postive
GNPAT	PLAC4	0.323851	0.000273909	postive
GNPAT	PART1	0.300491	0.000771197	postive
GNPAT	N4BP2L2-IT2	0.303531	0.000677201	postive
GNPAT	LINC00894	0.309338	0.00052628	postive
GNPAT	LINC00667	0.363258	3.91563e-05	postive
GNPAT	LINC00652	0.304825	0.000640484	postive
GNPAT	LINC00588	0.329297	0.000212557	postive
GNPAT	IGF2-AS	0.383143	1.32584e-05	postive
GNPAT	HEXA-AS1	0.367523	3.1225e-05	postive
GNPAT	GUSBP11	0.377566	1.80932e-05	postive
GNPAT	FLJ13224	0.376702	1.89759e-05	postive
GNPAT	FAM182A	0.381692	1.4383e-05	postive
GNPAT	ERC2-IT1	0.357631	5.25275e-05	postive
GNPAT	ENTPD1-AS1	0.365621	3.45564e-05	postive
GNPAT	CTC-338M12.4	0.345388	9.76838e-05	postive
GNPAT	C7orf69	0.359322	4.81159e-05	postive
GNPAT	C5orf66	0.346709	9.14708e-05	postive
GNPAT	AGAP11	0.392957	7.56541e-06	postive
GNAI2	THAP9-AS1	-0.345906	9.52062e-05	negative
GNAI2	CYB561D2	0.524865	5.43739e-10	postive
GLTP	TCL6	0.315126	0.000407201	postive
GLTP	RNF185-AS1	0.452436	1.67846e-07	postive
GLTP	RFPL3S	0.368539	2.95726e-05	postive
GLTP	PTGER4P2-CDK2AP2P2	0.340282	0.000125596	postive
GLTP	MYCNOS	0.361534	4.28704e-05	postive
GLTP	LINC00963	0.308194	0.000553305	postive
GLTP	KLF3-AS1	0.352067	6.98583e-05	postive
GLTP	KIAA0087	0.434613	5.6757e-07	postive
GLTP	HCG18	0.327813	0.000227871	postive
GLTP	HAND2-AS1	0.430206	7.59036e-07	postive
GLTP	GSN-AS1	0.300271	0.000778428	postive
GLTP	GS1-600G8.3	0.399165	5.25577e-06	postive
GLTP	FAM66D	0.306377	0.000598865	postive
GLTP	FAM224A	0.308922	0.000535966	postive
GLTP	FAM215A	0.300168	0.000781858	postive
GLTP	DTX2P1-UPK3BP1-PMS2P11	0.324291	0.000268405	postive
GLTP	DLEU2L	0.474108	3.46403e-08	postive
GLTP	DLEU2	0.317355	0.000368404	postive
GLTP	DLEU1	0.340432	0.000124676	postive
GLTP	DKFZP434A062	0.368137	3.02158e-05	postive
GLTP	DIAPH2-AS1	0.360897	4.43223e-05	postive
GLTP	DBET	0.32924	0.000213123	postive
GLTP	CT62	0.311084	0.00048735	postive
GLTP	CPS1-IT1	0.442562	3.32473e-07	postive
GLTP	C22orf24	0.408216	3.04949e-06	postive
GLTP	BPESC1	0.431632	6.91243e-07	postive
GLTP	ATXN8OS	0.39121	8.37084e-06	postive
GLTP	AGAP11	0.33899	0.000133752	postive
GLTP	AC007389.3	0.310674	0.000496241	postive
GLTP	AC004490.1	0.346627	9.18486e-05	postive
GLIPR1	HCP5	0.359414	4.78885e-05	postive
GLB1L	WT1-AS	0.311658	0.000475152	postive
GLB1L	PTGER4P2-CDK2AP2P2	0.312624	0.000455246	postive
GLB1L	PLAC4	0.346129	9.41525e-05	postive
GLB1L	NOP14-AS1	0.405582	3.57865e-06	postive
GLB1L	NDUFB2-AS1	0.306297	0.000600954	postive
GLB1L	N4BP2L2-IT2	0.302848	0.000697362	postive
GLB1L	LINC00894	0.378674	1.70171e-05	postive
GLB1L	LINC00652	0.363471	3.87207e-05	postive
GLB1L	LINC00563	0.365974	3.3914e-05	postive
GLB1L	LINC00216	0.301378	0.000742588	postive
GLB1L	HCG9	0.410591	2.63645e-06	postive
GLB1L	DSCR4	0.301441	0.00074062	postive
GBA	KIAA0087	0.340798	0.000122469	postive
GBA	GS1-600G8.3	0.332695	0.000181012	postive
GBA	DKFZP434A062	0.345786	9.57732e-05	postive
GBA	DBET	0.346449	9.26663e-05	postive
[truncated: 995 more rows]
